# Supplementary material for: Association of tea drinking and dysmenorrhoea among reproductive-age women in Shanghai, China (2013–2015): a cross-sectional study
Source: PubMed Central journal article supplement — BMJ Open. 2019 Apr 8;9(4):e026643. doi: 10.1136/bmjopen-2018-026643 (PMC6500245; doi:10.1136/bmjopen-2018-026643), 2019-04-08
Supplement: bmjopen-2018-026643.draft_revisions.pdf [file bmjopen-2018-026643.draft_revisions.pdf]

# BMJ Open

BMJ Open is committed to open peer review. As part of this commitment we make the peer review history of every article we publish publicly available.

When an article is published we post the peer reviewers' comments and the authors' responses online. We also post the versions of the paper that were used during peer review. These are the versions that the peer review comments apply to.

The versions of the paper that follow are the versions that were submitted during the peer review process. They are not the versions of record or the final published versions. They should not be cited or distributed as the published version of this manuscript.

BMJ Open is an open access journal and the full, final, typeset and author-corrected version of record of the manuscript is available on our site with no access controls, subscription charges or pay-per-view fees (<http://bmjopen.bmj.com>).

If you have any questions on BMJ Open's open peer review process please email [editorial.bmjopen@bmj.com](mailto:editorial.bmjopen@bmj.com)

# BMJ Open

## Association of Tea Drinking and Dysmenorrhea among reproductive-age women in China

|                               |                                                                                                                                                                                                                                                                                                                                                                                                                                                                                                                                                                                                                                                                                                                                                                                                                                                                                                                                                                                                             |
|-------------------------------|-------------------------------------------------------------------------------------------------------------------------------------------------------------------------------------------------------------------------------------------------------------------------------------------------------------------------------------------------------------------------------------------------------------------------------------------------------------------------------------------------------------------------------------------------------------------------------------------------------------------------------------------------------------------------------------------------------------------------------------------------------------------------------------------------------------------------------------------------------------------------------------------------------------------------------------------------------------------------------------------------------------|
| Journal:                      | <i>BMJ Open</i>                                                                                                                                                                                                                                                                                                                                                                                                                                                                                                                                                                                                                                                                                                                                                                                                                                                                                                                                                                                             |
| Manuscript ID                 | bmjopen-2018-026643                                                                                                                                                                                                                                                                                                                                                                                                                                                                                                                                                                                                                                                                                                                                                                                                                                                                                                                                                                                         |
| Article Type:                 | Research                                                                                                                                                                                                                                                                                                                                                                                                                                                                                                                                                                                                                                                                                                                                                                                                                                                                                                                                                                                                    |
| Date Submitted by the Author: | 12-Sep-2018                                                                                                                                                                                                                                                                                                                                                                                                                                                                                                                                                                                                                                                                                                                                                                                                                                                                                                                                                                                                 |
| Complete List of Authors:     | Zhang, Xiaoyu; Ministry of Education-Shanghai Key Laboratory of Children's Environmental Health, Xinhua Hospital, Shanghai Jiao Tong University School of Medicine<br>Zhang, Rongrong; Department of Obstetrics and Gynecology, Xinhua Hospital, Shanghai Jiao Tong University School of Medicine<br>Chen, Dan; Ministry of Education-Shanghai Key Laboratory of Children's Environmental Health, Xinhua Hospital, Shanghai Jiao Tong University School of Medicine<br>Huang, Rong; Ministry of Education-Shanghai Key Laboratory of Children's Environmental Health, Xinhua Hospital, Shanghai Jiao Tong University School of Medicine<br>Tian, Ying; School of Public Health, Shanghai Jiao Tong University<br>Zhang, Ping; Department of Obstetrics and Gynecology, Xinhua Hospital, Shanghai Jiao Tong University School of Medicine<br>Zhang, Jun; Ministry of Education-Shanghai Key Laboratory of Children's Environmental Health, Xinhua Hospital, Shanghai Jiao Tong University School of Medicine |
| Keywords:                     | tea, dysmenorrhea, women of reproductive age                                                                                                                                                                                                                                                                                                                                                                                                                                                                                                                                                                                                                                                                                                                                                                                                                                                                                                                                                                |
|                               |                                                                                                                                                                                                                                                                                                                                                                                                                                                                                                                                                                                                                                                                                                                                                                                                                                                                                                                                                                                                             |

SCHOLARONE™  
Manuscripts

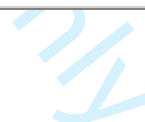

1  
2  
3 **Association of Tea Drinking and Dysmenorrhea among reproductive-age**  
4  
5 **women in China**  
6

7 Xiaoyu Zhang<sup>a</sup>, Rongrong Zhang<sup>b</sup>, Dan Chen<sup>a</sup>, Rong Huang<sup>a</sup>, Ying Tian<sup>c</sup>, Ping Zhang<sup>\*b</sup>, Jun Zhang<sup>\*a</sup> for the  
8  
9 Shanghai Birth Cohort  
10

11 <sup>a</sup> Ministry of Education-Shanghai Key Laboratory of Children's Environmental Health, Xinhua Hospital,  
12  
13 Shanghai Jiao Tong University School of Medicine, Shanghai, 200092, China  
14

15 <sup>b</sup> Department of Obstetrics and Gynecology, Xinhua Hospital, Shanghai Jiao Tong University School of  
16  
17 Medicine, Shanghai, 200092, China  
18

19 <sup>c</sup> School of Public Health, Shanghai Jiao Tong University, Shanghai, 200025, China  
20

21 **Corresponding authors**  
22

23 Address correspondence to J Zhang, Xinhua Hospital, Shanghai Jiao Tong University School of Medicine,  
24  
25 Shanghai, 200092, China. Telephone: (Work) +86-21-2507 8871, (Fax) +86-21-2507 8875. E-mail:  
26  
27 junjimzhang@sina.com; or P Zhang, Department of Obstetrics and Gynecology, Xinhua Hospital,  
28  
29 Shanghai Jiao Tong University School of Medicine, Shanghai, 200092, China. Telephone: (Work)  
30  
31 +8613651788220, (Fax) +8625078200, E-mail: zjqzp@126.com.  
32  
33  
34  
35  
36  
37  
38  
39  
40  
41  
42  
43  
44  
45  
46  
47  
48  
49  
50  
51  
52  
53  
54  
55  
56  
57  
58  
59  
60

## ABSTRACT

**Objectives:** To investigate the association between tea drinking and dysmenorrhea among women of reproductive age.

**Design:** A cross-sectional study based on Shanghai Birth Cohort Study.

**Setting:** Two preconceptional care clinics in Shanghai, China.

**Participants:** 1183 women of reproductive age who sought preconceptional care were recruited from Aug 2013 to April 2015.

**Primary and secondary outcome measures:** Information on demographic, menstrual characteristics and lifestyle factors was collected at the enrollment. A multinomial logistic regression was performed to assess the relationship of tea drinking with dysmenorrhea.

**Results:** The prevalence of dysmenorrhea was 57.8%, among whom 10.4% and 3.5% had moderate and severe dysmenorrhea, respectively. Tea drinking was associated with a lower prevalence of dysmenorrhea (adjusted odds ratio [aOR]=0.68, 95%CI: 0.50-0.93 for mild dysmenorrhea; aOR=0.59 (0.32-1.04) for moderate-to-severe dysmenorrhea). Green tea and oolong tea appeared to have most reduction in the prevalence of dysmenorrhea [For mild dysmenorrhea: green tea: aOR=0.63 (0.44-0.90) and oolong tea: aOR=0.60 (0.35-1.03); for moderate-to-severe dysmenorrhea: green tea: aOR=0.42 (0.20-0.85) and oolong tea: aOR=0.34 (0.11-1.09)].

**Conclusions:** Consumptions of green tea and possibly oolong tea were associated with a lower prevalence of dysmenorrhea.

**Keywords:** tea; dysmenorrhea; women of reproductive age

**Word accounts:** 2906

**Article Summary**

1. This was a large, population-based study, involving extensive potential confounders in the analyses.
2. This was a cross-sectional study, and therefore cannot establish a causal relationship.
3. The information on dysmenorrhea was based on participant's self-report.

For peer review only

## INTRODUCTION

Dysmenorrhea, a common gynecological disorder, refers to painful cramps in the pelvis or lower abdomen beginning shortly before or during menstruation. Due to the lack of a standard method grading dysmenorrhea-related pain, the estimated prevalence of dysmenorrhea varied widely, ranging from 16.8% to 81%[1]. A study from China reported that 56.4% of female university students had dysmenorrhea, and among them, 6.5% had very severe (unbearable) symptoms[2]. Dysmenorrhea is not only a personal health problem, but also increases economic burden to the society. It was estimated that it costed \$881.5 million on outpatient management and 600 million working hours lost in the US annually[3,4].

Overproduction of uterine prostaglandins from arachidonic acid through cyclo-oxygenase (COX) pathway has been commonly accepted as the etiology of primary dysmenorrhea[3]. The intensity of painful cramps and dysmenorrhea-related symptoms are proportional to the level of prostaglandin released[5]. Non-steroidal anti-inflammatory drugs (NSAIDs) is commonly prescribed as the first line of treatment for dysmenorrhea, due to its suppression of COX activity. However, the inhibitory effect of NSAIDs on COX-1 brings about several physiological concerns[6,7]. 10%-20% of women with primary dysmenorrhea fail to respond to or are intolerable to NSAIDs[6]. More and more women with dysmenorrhea resort to complementary and alternative medicine.

Tea has been considered as a medicinal staple for hundreds of years in China, thanks to the potential health benefits of tea flavonoids as antioxidants, anti-carcinogenic and anti-arteriosclerotic agent. Recently, green tea catechins have been demonstrated their inhibitory effect on COX-2 activity[8,9]. Hence, it is hypothesized that green tea may possibly decrease prostaglandin level and thereby relieve the severity of dysmenorrhea. However, there is a huge paucity of epidemiological evidence of the relationship of tea drinking with dysmenorrhea, especially green tea consumption and the association is still inconsistent. A cross-sectional study of 729 Turkish women of reproductive age showed no association between tea drinking and

dysmenorrhea[10], while another small study with 440 female university students suggested that students consuming >4 glasses of tea per day had a higher risk of primary dysmenorrhea than those who did not drink tea[11]. The present study aims to examine the relationship between tea drinking and dysmenorrhea in women of reproductive age in Chinese women.

## **MATERIALS AND METHODS**

This study is based on the Shanghai Birth Cohort Study, which is a hospital-based, multi-center cohort study. It aims to assess the impacts of genetic, environmental and behavioral factors on reproductive health, pregnancy outcomes, child growth, development and risks of diseases.

### **Patient and participant involvement**

Couples of reproductive age were recruited at either preconception or first trimester of pregnancy. Potential participants who agreed to participate in the study would signed an informed consent during recruitment. Women were followed at several time points, including preconception (if they were recruited before pregnancy), 1<sup>st</sup>, 2<sup>nd</sup>, 3<sup>rd</sup> trimesters and birth, and husbands were interviewed at preconception or at birth. Information on demographic characteristics, health behaviors, social support, reproductive and medical history, and family history of diseases was collected. Biological specimens were collected at each round of follow-up for further analyses.

This study used data from the preconception women who sought preconceptional care at 2 preconceptional care clinics in Shanghai, China, with the following inclusion criteria: 1) married women with age  $\geq$  20yrs (legal marriage age in China); 2) plan to be pregnant in the following year; 3) registered resident of Shanghai who do not plan to move out in the next 2 years; 4) plan to give birth in collaborating hospitals. Women who had tried to conceive for 12 months or longer were excluded from this study.

### **Socio-demographic characteristics**

Participants provided information on demographic characteristics and lifestyle factors. Demographic characteristics include age, ethnicity, education level, income by herself, household

1  
2  
3 income, as well as height and weight. Body mass index (BMI) was calculated as weight in  
4 kilograms divided by height in meters squared. Lifestyle factors included smoking history, alcohol  
5 intake, consumption of fruits and vegetables, use of dietary supplements and physical activity  
6 which was assessed by International Physical Activity Questionnaire short version[12].  
7  
8  
9  
10

11 In addition, the consumptions of caffeinated beverages, such as coffee, soda (Coca-Cola,  
12 Pepsi), and energy drink (e.g., Red Bull), were queried. Specifically, the consumption of tea was  
13 assessed by a structured questionnaire. Participants were asked whether they drank tea in their  
14 daily life. If yes, what type of tea they usually drank, including green, oolong and black tea, which  
15 are commonly consumed in China. They could choose one or multiple categories depending on  
16 their tea drinking habits. Participants were also asked about the number of years of tea drinking  
17 and the choices were “<1 year”, “1-5 years”, “6-10 years” and “>10 years”, and the number of  
18 cups per day.  
19  
20  
21  
22  
23  
24  
25  
26  
27

### 28 **Menstrual characteristics**

29  
30 Women were asked about menstrual characteristics including the onset of menarche,  
31 menstrual cycle length, bleeding duration, volume of menstrual flow and dysmenorrhea. If  
32 participants stated that they had pelvic pain associated with menstrual bleeding during the past  
33 12 months, they were further asked to grade the intensity of menstrual cramp as mild, moderate  
34 and severe. Mild pain was defined as one could feel the pain but did not need further treatment.  
35 Moderate pain was defined as one needed to use therapy or treatment to relieve dysmenorrhea,  
36 and severe pain was referred as taking absence of work or bed rest besides treatment. The  
37 regularity of menstrual cycle length was assessed with the question: “Is your menstrual cycle  
38 length regular?”. Length variation of 8 days or more was considered as irregular. If irregular, the  
39 durations of the shortest and longest menstrual cycles were asked. If regular, participants stated  
40 the average length of their menstrual cycle. Participants were asked to state their volume of  
41 menstrual flow with four choices: “light”, “normal” and “heavy”.  
42  
43  
44  
45  
46  
47  
48  
49  
50  
51  
52  
53  
54

### 55 **Statistical analysis**



All the analyses were performed using R studio (Version 1.0.136). The primary result was the relationship between tea drinking and dysmenorrhea, which was performed by multinomial logistic regression model. In addition, the difference in demographic characteristics and lifestyle factors according to the severity of dysmenorrhea was analyzed by Kruskal-Wallis test for categorical variables and one-way ANOVA for continuous variables. Variables with  $P < 0.05$  of the significance test for the difference were selected in the final logistic model. Other confounders were selected if they could change the coefficient by more than 10% compared with unadjusted coefficient.  $P < 0.05$  (two sides) was considered statistically significant.

## RESULTS

A total of 1183 participants were recruited, of whom 23 did not finish the interview and 8 participants did not provide information on severity of dysmenorrhea, leaving 1152 women for the final analysis.

The prevalence of dysmenorrhea was 57.8% (666/1152). Among them, 86.2% (574) had mild, 10.4% (69) moderate, and 3.5% (23) severe dysmenorrhea. Since the total number of moderate and severe dysmenorrhea was only 99, we combined them together for further analyses.

The average age of all the 1152 participants was  $29.4 \pm 3.2$  years, ranging from 21 to 44 years. 5% of women were 35 years or older. Women with moderate to severe dysmenorrhea had a mean age of  $28.4 \pm 2.4$  years, in comparison to  $29.9 \pm 3.5$  years in women without dysmenorrhea ( $P < 0.001$ ). The average BMI was  $21.0 \pm 2.7$  kg/m<sup>2</sup>, with 7.2% being overweight or obese (BMI  $\geq 25$  kg/m<sup>2</sup>). Non-dysmenorrhea group had a higher BMI than mild-dysmenorrhea group, followed by moderate-to-severe group ( $P = 0.021$ ). There was no difference in education, women's income and household income among the three groups.

The average age of the onset of menarche was  $13.4 \pm 1.3$  years (Table 1). The average length of menstrual cycle and bleeding was  $29.8 \pm 3.5$  days and  $5.7 \pm 1.3$  days, respectively, among all the women of reproductive age. The prevalence of moderate-to-severe dysmenorrhea

was higher in women with heavy menstrual flow, compared with women with light and normal menses. Multiparous women were less likely to have dysmenorrhea ( $P<0.001$ ).

Table 2 presents the distribution of lifestyle factors according to the intensity of dysmenorrhea. Very few women smoked. There was no association between smoking and dysmenorrhea. However, women who were exposed to second-hand smoke from her husband, roommates or colleagues were more likely to have dysmenorrhea ( $P<0.001$ ).

**Table 1. Demographic and menstrual characteristics according to the severity of dysmenorrhea**

| Variables                            | Dysmenorrhea (N (%) or (Mean $\pm$ SD)) |                |                         | P-value |
|--------------------------------------|-----------------------------------------|----------------|-------------------------|---------|
|                                      | No (486)                                | Mild (574)     | Moderate-to-severe (92) |         |
| <b>Age</b>                           | 29.9 $\pm$ 3.5                          | 29.2 $\pm$ 3.0 | 28.4 $\pm$ 2.4          | <0.001  |
| <b>BMI</b>                           | 21.2 $\pm$ 2.9                          | 20.9 $\pm$ 2.5 | 20.3 $\pm$ 3.0          | 0.021   |
| <b>Race</b>                          |                                         |                |                         | 0.733   |
| Han                                  | 474 (42.2)                              | 559 (49.8)     | 89 (7.9)                |         |
| Others                               | 12 (40.0)                               | 15 (50.0)      | 3 (10.0)                |         |
| <b>Education</b>                     |                                         |                |                         | 0.533   |
| Junior college                       | 96 (42.7)                               | 113 (50.2)     | 16 (7.1)                |         |
| Undergraduate                        | 302 (43.0)                              | 346 (49.2)     | 55 (7.8)                |         |
| Graduate                             | 88 (39.3)                               | 115 (51.3)     | 21 (9.4)                |         |
| <b>Home income</b>                   |                                         |                |                         | 0.646   |
| < ¥100K                              | 31 (36.9)                               | 48 (57.1)      | 5 (6.0)                 |         |
| ¥100-150K                            | 77 (41.4)                               | 96 (51.6)      | 13 (7.0)                |         |
| ≥ ¥150K                              | 357 (43.9)                              | 392 (48.2)     | 65 (8.0)                |         |
| <b>Personal income</b>               |                                         |                |                         | 0.622   |
| < ¥100K                              | 241 (40.3)                              | 315 (52.7)     | 42 (7.0)                |         |
| ¥100-150K                            | 159 (45.2)                              | 161 (45.7)     | 32 (9.1)                |         |
| ≥ ¥150K                              | 62 (43.7)                               | 68 (47.9)      | 12 (8.5)                |         |
| <b>Having had a pregnancy</b>        |                                         |                |                         | <0.001  |
| No                                   | 244 (37.2)                              | 344 (52.4)     | 68 (10.4)               |         |
| Yes                                  | 241 (48.7)                              | 230 (46.5)     | 24 (4.8)                |         |
| <b>Volume of menstrual flow</b>      |                                         |                |                         | <0.001  |
| Light                                | 48(48.0)                                | 44(44.0)       | 8(8.0)                  |         |
| Normal                               | 419(43.2)                               | 487(50.2)      | 65(6.7)                 |         |
| Heavy                                | 18(23.1)                                | 41(52.6)       | 19(24.4)                |         |
| <b>Regularity of menstrual cycle</b> |                                         |                |                         | 0.773   |
| Regular                              | 393 (41.7)                              | 479 (50.8)     | 71 (7.5)                |         |
| Irregular                            | 93 (44.5)                               | 95 (45.5)      | 21 (10.0)               |         |
| <b>Length of menstrual cycle</b>     | 29.8 $\pm$ 2.9                          | 29.7 $\pm$ 2.9 | 30.3 $\pm$ 7.7          | 0.308   |
| <b>Bleeding duration</b>             | 5.6 $\pm$ 1.4                           | 5.7 $\pm$ 1.2  | 5.7 $\pm$ 1.3           | 0.268   |
| <b>Onset of menarche</b>             | 13.4 $\pm$ 1.4                          | 13.4 $\pm$ 1.3 | 13.4 $\pm$ 1.3          | 0.763   |

P-value was obtained by Kruskal-Wallis test for categorical variables and one-way ANOVA for continuous variables

**Table 2. Lifestyle factors according to the severity of dysmenorrhea**

| Variables                                   | Dysmenorrhea (N (%)) |            |                         | P-value |
|---------------------------------------------|----------------------|------------|-------------------------|---------|
|                                             | No (486)             | Mild (574) | Moderate-to-severe (92) |         |
| <b>Smoking now</b>                          |                      |            |                         | 0.193   |
| No                                          | 481 (42.3)           | 569 (50.0) | 88 (7.7)                |         |
| Yes                                         | 5 (35.7)             | 5 (35.7)   | 4 (28.6)                |         |
| <b>Used to smoke</b>                        |                      |            |                         | 0.604   |
| No                                          | 471 (42.2)           | 557 (50.0) | 87 (7.8)                |         |
| Yes                                         | 9 (47.4)             | 9 (47.4)   | 1 (5.3)                 |         |
| <b>Second-hand smoke</b>                    |                      |            |                         | <0.001  |
| No                                          | 365 (46.5)           | 363 (46.2) | 57 (7.3)                |         |
| Yes                                         | 121 (33.2)           | 209 (57.3) | 35 (9.6)                |         |
| <b>Alcohol drinking within one year</b>     |                      |            |                         | 0.110   |
| No                                          | 325 (43.6)           | 366 (49.1) | 54 (7.2)                |         |
| Yes                                         | 160 (39.4)           | 208 (51.2) | 38 (9.4)                |         |
| <b>Current alcohol drinking</b>             |                      |            |                         | 0.676   |
| No                                          | 469 (42.3)           | 551 (49.7) | 88 (7.9)                |         |
| Yes                                         | 17 (39.5)            | 22 (51.2)  | 4 (9.3)                 |         |
| <b>Vitamin E</b>                            |                      |            |                         | 0.065   |
| No                                          | 392 (41.3)           | 474 (49.9) | 84 (8.8)                |         |
| Yes                                         | 81 (46.8)            | 85 (49.1)  | 7 (4.0)                 |         |
| <b>Supplementation of fish oil</b>          |                      |            |                         | 0.874   |
| No                                          | 438 (42.0)           | 519 (49.8) | 85 (8.2)                |         |
| Yes                                         | 33 (42.9)            | 38 (49.4)  | 6 (7.8)                 |         |
| <b>Leaf vegetables</b>                      |                      |            |                         | 0.359   |
| <1 per week                                 | 8 (57.1)             | 6 (42.9)   | 0 (0)                   |         |
| 1-3 per week                                | 73 (42.4)            | 81 (47.1)  | 18 (10.5)               |         |
| 4-7 per week                                | 264 (40.7)           | 330 (50.9) | 54 (8.3)                |         |
| ≥ 2 per day                                 | 137 (44.1)           | 154 (49.5) | 20 (6.4)                |         |
| <b>Fruits</b>                               |                      |            |                         | 0.262   |
| <1 per week                                 | 8 (32.0)             | 15 (60.0)  | 2 (8.0)                 |         |
| 1-3 per week                                | 90 (39.1)            | 113 (49.1) | 27 (11.7)               |         |
| 4-7 per week                                | 286 (43.4)           | 331 (50.2) | 42 (6.4)                |         |
| ≥ 2 per day                                 | 99 (43.2)            | 109 (47.6) | 21 (9.2)                |         |
| <b>Vigorous physical activity</b>           |                      |            |                         | 0.460   |
| No                                          | 393 (41.6)           | 475 (50.3) | 77(8.1)                 |         |
| Yes                                         | 85 (44.7)            | 90 (47.4)  | 15(7.9)                 |         |
| <b>Moderate physical activity</b>           |                      |            |                         | 0.456   |
| No                                          | 300 (41.3)           | 366 (50.3) | 61 (8.4)                |         |
| Yes                                         | 171 (43.4)           | 193 (49.0) | 30 (7.6)                |         |
| <b>Walk</b>                                 |                      |            |                         | 0.195   |
| No                                          | 24 (57.1)            | 12 (28.6)  | 6 (14.3)                |         |
| Yes                                         | 409 (41.6)           | 495 (50.4) | 78 (7.9)                |         |
| P-value was obtained by Krustal-Wallis test |                      |            |                         |         |

Consumptions of vegetables, fruits, dietary supplements of Vitamin E and fish oil were not associated with the severity of menstrual pain (Table 2). However, the prevalence of moderate-to-severe dysmenorrhea was slightly higher in women who did not take Vitamin E, compared with Vitamin E consumers (8.8% versus 4.0%,  $P=0.065$ ). Physical activity (vigorous, moderate or walking) was not associated with the severity of dysmenorrhea.

**Table 3. Caffeinated beverages according to the severity of dysmenorrhea**

| Variables                      | Dysmenorrhea |            |                         |
|--------------------------------|--------------|------------|-------------------------|
|                                | No (486)     | Mild (574) | Moderate-to-severe (92) |
| <b>Tea</b>                     |              |            |                         |
| No                             | 308 (40.8)   | 384 (50.9) | 62 (8.2)                |
| Yes                            | 178 (44.7)   | 190 (47.7) | 30 (7.5)                |
| <b>Green tea</b>               |              |            |                         |
| No                             | 347 (40.2)   | 443 (51.3) | 74 (8.6)                |
| Yes                            | 139 (48.3)   | 131 (45.5) | 18 (6.3)                |
| <b>Black tea</b>               |              |            |                         |
| No                             | 413 (42.7)   | 481 (49.7) | 74 (7.6)                |
| Yes                            | 73 (39.7)    | 93 (50.5)  | 18 (9.8)                |
| <b>Oolong tea</b>              |              |            |                         |
| No                             | 434 (41.3)   | 528 (50.3) | 88 (8.4)                |
| Yes                            | 52 (51.0)    | 46 (45.1)  | 4 (3.9)                 |
| <b>Coffee</b>                  |              |            |                         |
| No                             | 275 (43.9)   | 317 (50.6) | 34 (5.4)                |
| Yes                            | 211 (40.1)   | 257 (48.9) | 58 (11.0)               |
| <b>Soda (Coca-Cola, Pepsi)</b> |              |            |                         |
| No                             | 335 (43.7)   | 381 (49.7) | 51 (6.6)                |
| Yes                            | 151 (39.2)   | 193 (50.1) | 41 (10.6)               |
| <b>Energy beverages</b>        |              |            |                         |
| No                             | 462 (42.7)   | 539 (49.8) | 81 (7.5)                |
| Yes                            | 24 (34.3)    | 35 (50.0)  | 11 (15.7)               |

**P-value was obtained by Krustal-Wallis test**

The prevalence of tea drinking was 34.5% (398 of 1152) among women with reproductive age, and the number of tea drinkers according to the severity of dysmenorrhea was shown in table 3. Table 4 shows the association between tea drinking and dysmenorrhea. After adjusting for age, BMI, personal income, ever pregnant, consumption of caffeinated beverages (coffee, Soda or energy drink), alcohol drinking during last 12 months, second-hand smoke, supplementation of fish oil, consumption of leaf vegetable, moderate physical activity and walking,

tea drinking was associated with a lower prevalence of mild dysmenorrhea [aOR=0.68 (0.50-0.93)]. The aOR [0.49 (0.31-0.79)] of mild dysmenorrhea was attenuated by half in women who drank tea for 3-5 cups per day compared with women who did not drink tea, whereas we did not find such relationship in higher tea consumers ( $\geq 6$  cups/day). We did not find a relationship between number of years of tea drinking and severity of dysmenorrhea among tea drinkers, which may be a result of small sample size. Consumption of green tea was associated with a lower prevalence of dysmenorrhea, and the relationship was stronger in moderate-to-severe dysmenorrhea [aOR=0.42 (0.20-0.85)] than in mild dysmenorrhea [aOR=0.63 (0.44-0.90)], which is shown in table 5. Consumption of oolong tea was slightly associated with prevalence of dysmenorrhea [aOR=0.60 (0.35-1.03),  $P=0.063$  for mild dysmenorrhea; aOR=0.34 (0.11-1.09),  $P=0.070$  for moderate-to-severe dysmenorrhea], which may be ascribed to a small sample size since only 4 oolong tea-drinkers had moderate-to-severe dysmenorrhea.

**Table 4. Relationship of tea drinking and dysmenorrhea**

| Variable                               | Crude model (cOR) |                 |                         | Adjusted model (aOR) <sup>a</sup> |                         |
|----------------------------------------|-------------------|-----------------|-------------------------|-----------------------------------|-------------------------|
|                                        | No (486)          | Mild (574)      | Moderate-to-severe (92) | Mild (574)                        | Moderate-to-severe (92) |
| <b>Tea</b>                             |                   |                 |                         |                                   |                         |
| No                                     | 1                 | 1               | 1                       | 1                                 | 1                       |
| Yes                                    | 1                 | 0.86(0.66-1.10) | 0.84(0.52-1.34)         | 0.68(0.50-0.93)                   | 0.59(0.32-1.04)         |
| <b>Number of cups/day</b>              |                   |                 |                         |                                   |                         |
| 0 per day                              | 1                 | 1               | 1                       | 1                                 | 1                       |
| 1-2 cups/day                           | 1                 | 0.97(0.71-1.33) | 1.06(0.61-1.84)         | 0.80(0.55-1.17)                   | 0.71(0.36-1.41)         |
| 3-5 cups/day                           | 1                 | 0.66(0.44-0.98) | 0.57(0.25-1.31)         | 0.49(0.31-0.79)                   | 0.39(0.15-1.00)         |
| $\geq 6$ cups/day                      | 1                 | 0.80(0.43-1.50) | 0.71(0.21-2.45)         | 0.75(0.37-1.53)                   | 0.77(0.21-2.86)         |
| <b>Number of years of tea drinking</b> |                   |                 |                         |                                   |                         |
| <1 year                                | 1                 | 1               | 1                       | 1                                 | 1                       |
| 1-5 years                              | 1                 | 0.64(0.36-1.13) | 1.41(0.44-4.50)         | 0.53(0.26-1.07)                   | 2.13(0.40-11.2)         |
| $\geq 6$ years                         | 1                 | 0.61(0.33-1.14) | 0.71(0.18-2.73)         | 0.54(0.24-1.25)                   | 1.67(0.25-11.2)         |

<sup>a</sup> model 1 was a crude multinomial logistic regression which was used for each outcome

<sup>b</sup> model 2 was an adjusted multinomial logistic regression model for each outcome, and was adjusted for age, BMI, personal income, ever pregnant, caffeinated beverages drinking, alcohol drinking now and during last one year, second-hand smoke, supplementation of fish oil, consumption of leaf vegetables, moderate- and walk-intensity physical activity.

**Table 5. Odds ratios for dysmenorrhea according to consumption of type of tea beverage**

| Variable   | Crude model (cOR) <sup>a</sup> |                 |                         | Adjusted model (aOR) <sup>b</sup> |                         |
|------------|--------------------------------|-----------------|-------------------------|-----------------------------------|-------------------------|
|            | No (486)                       | mild (574)      | Moderate-to-severe (92) | Mild (574)                        | Moderate-to-severe (92) |
| Green tea  | 1                              | 0.74(0.56-0.97) | 0.61(0.35-1.05)         | 0.63(0.44-0.90)                   | 0.42(0.20-0.85)         |
| Black tea  | 1                              | 1.09(0.78-1.53) | 1.38(0.78-2.44)         | 1.27(0.81-2.00)                   | 1.96(0.94-4.10)         |
| Oolong tea | 1                              | 0.73(0.48-1.10) | 0.38(0.13-1.08)         | 0.60(0.35-1.03)                   | 0.34(0.11-1.09)         |

<sup>a</sup> model 1 was a crude multinomial logistic regression model which was used for each type of tea beverage separately

<sup>b</sup> model 2 was an adjusted multinomial logistic regression model including three types of tea beverages as independent variables, and was adjusted for age, BMI, personal income, ever pregnant, caffeinated beverages drinking, alcohol drinking now and during last one year, second-hand smoke, supplementation of fish oil, consumption of leaf vegetables, moderate- and walk-intensity physical activity

As for the relationship between each caffeine-contained beverage (coffee, Soda and energy drink) and severity of dysmenorrhea (Table 6), women with moderate-to-severe dysmenorrhea were twice more likely to be coffee drinkers than women without dysmenorrhea (adjusted odds ratio [aOR]=2.11, 95%CI:1.22-3.62). However, after adjusting for potential confounders, consumption of neither soda nor energy beverages was associated with prevalence of moderate-to-severe dysmenorrhea.

**Table 6. Odds ratios for dysmenorrhea according to consumption of caffeinated beverage**

| Variable         | Crude model (cOR) <sup>a</sup> |                 |                         | Adjusted model (aOR) <sup>b</sup> |                         |
|------------------|--------------------------------|-----------------|-------------------------|-----------------------------------|-------------------------|
|                  | No (486)                       | mild (574)      | Moderate-to-severe (92) | Mild (574)                        | Moderate-to-severe (92) |
| Coffee           | 1                              | 1.06(0.83-1.35) | 2.22(1.40-3.52)         | 1.08(0.80-1.44)                   | 2.11(1.22-3.62)         |
| Soda             | 1                              | 1.12(0.87-1.45) | 1.78(1.13-2.81)         | 1.05(0.76-1.44)                   | 1.20(0.69-2.10)         |
| Energy beverages | 1                              | 1.25(0.73-2.13) | 2.61(1.23-5.54)         | 0.91(0.50-1.69)                   | 1.65(0.66-4.15)         |

<sup>a</sup> model 1 was a crude multinomial logistic regression model which was used for each caffeinated beverage separately

<sup>b</sup> model 2 was an adjusted multinomial logistic regression model including three caffeinated beverages as independent variables, and was adjusted for age, BMI, personal income, ever pregnant, second-hand smoke, walk-intensity physical activity, tea drinking

## DISCUSSION

The present study found that more than half of Chinese reproductive age women (57.8%) had some degree of dysmenorrhea. Exposure to second-hand smoke or consumption of coffee

1  
2  
3 were positively associated with moderate-to-severe dysmenorrhea. After adjustment for the  
4 potential confounders, consumptions of green tea and possibly oolong tea were associated with  
5 lower prevalence of dysmenorrhea.  
6  
7  
8

9 The prevalence of dysmenorrhea in our population was consistent with previous studies. It  
10 was reported that at least 50% of women around the world[13] and 56.4% of university students  
11 in China suffered from dysmenorrhea[2]. However, the prevalence of severe dysmenorrhea in  
12 this study was slightly lower than the previous study (3.5% vs 6.5%, respectively)[2], which may  
13 be explained by the age difference between the study populations ( $29.4 \pm 3.2$  years in the current  
14 study versus  $20.3 \pm 1.3$  in Zhou's study[2]). Previous literature indicated that menstrual pain was  
15 alleviated to some degree with advancing age[10,14,15].  
16  
17  
18  
19  
20  
21  
22  
23

24 The relationship between dysmenorrhea and menstrual characteristics (such as onset of  
25 menarche, regular menses, bleeding duration) is still uncertain[16]. Some studies reported that  
26 older age at menarche was associated with a decreased risk of dysmenorrhea[14,17], while  
27 others showed no association[10,18]. Unsal et al. found that menstrual irregularity was one of risk  
28 factors for dysmenorrhea [OR=1.90 (1.22-32.95)][10]. As for blood flow, some studies showed  
29 that reduced menstrual flow may be a sign of uterine constriction and it was associated with  
30 cramp pain[5,19] while others showed that the severity of dysmenorrhea increased with  
31 increasing volume of blood flow[2,20]. Our study was consistent with the latter finding, that is,  
32 women with heavy blood flow were more likely to have dysmenorrhea. However, we did not find  
33 any other relationship between menstrual health and dysmenorrhea. Interestingly, our result  
34 showed that pregnancy history was inversely associated with dysmenorrhea, in line with previous  
35 studies[10,14].  
36  
37  
38  
39  
40  
41  
42  
43  
44  
45  
46  
47  
48

49 Our results showed a tendency towards dysmenorrhea relief when women drank tea in daily  
50 life. Those who consumed 3-5 cups/day of tea were 51% less likely to report having mild  
51 dysmenorrhea than non-drinkers. The observation of no relationship between high tea drinking  
52 ( $\geq 6$  cups/day) and dysmenorrhea may be true or due to chance; only 45 participants stated tea  
53  
54  
55  
56  
57  
58  
59  
60



1  
2  
3 consumption of  $\geq 6$  cups/day. In contrast, a small cross-sectional study with randomly selected  
4  
5 440 female university students in Ethiopia suggested that people drinking tea for more than 4  
6  
7 glasses/day has 19 times higher prevalence of dysmenorrhea than non-drinkers, the  
8  
9 corresponding aOR was 18.94 (2.19-163.73)[11]. However, the very wide confidence interval  
10  
11 indicates that the conclusion is uncertain.  
12

13  
14 Among three types of tea, our study showed that consumption of green tea may be beneficial  
15  
16 for relief of dysmenorrhea while consumption of black tea was not. The latter finding is consistent  
17  
18 with the results from a Turkey study - a cross-sectional study with 729 reproductive-age women,  
19  
20 which found no association between tea consumption and dysmenorrhea[10], as the traditional  
21  
22 tea in Turkey is black tea.  
23

24  
25 To explore whether caffeine in tea was responsible to the relief of dysmenorrhea, we  
26  
27 examined the association between consumption of caffeinated beverages, especially coffee, and  
28  
29 dysmenorrhea. Unlike tea, consumption of coffee was positively related to the severity of  
30  
31 dysmenorrhea in this study after adjustment of potential confounders. Previous studies showed  
32  
33 that the risk of dysmenorrhea was twice as high in high caffeine consumers ( $\geq 300$  mg/day)  
34  
35 compared with low/moderate caffeine consumers ( $< 300$  mg/day) [OR=1.97 (1.09-3.59)][21] and in  
36  
37 coffee consumers [OR=2.08 (1.34-3.24)][10]. The mechanism through which caffeine could  
38  
39 aggravate cramp-like pain is uncertain and further studies are warranted. One possible  
40  
41 mechanism is the vasoconstricting action of caffeine[22]. A study in pregnant women indicated  
42  
43 that caffeine stimulated uterine muscle and, consequently, caused increased uterine  
44  
45 contraction[23]. Uterine hypercontraction reduces blood flow and results in pain[5].  
46

47  
48 Instead, catechins in green tea might partly explain the observed relationship with relieved  
49  
50 severity of dysmenorrhea. The extent of the oxidative processing (also called "fermentation")  
51  
52 differs among three types of tea - green tea is minimally processed, while black tea is completely  
53  
54 fermented. Hence, catechins are rich in green tea followed by oolong tea, while much lower in  
55  
56 black tea, as it is unstable and sensitive to oxidization. A number of animal and *in vitro* studies  
57



1  
2  
3 suggested that green tea extract (catechins) was an effective inhibitor of COX-2 but not  
4  
5 COX-1[8,9], thereby preventing overproduction of uterine prostaglandin levels, a major  
6  
7 pathogenesis of primary dysmenorrhea. In addition, catechins inhibit the activity of phospholipase  
8  
9 A2, an enzyme involved in the production of arachidonic acid, and consequently decreases the  
10  
11 production of additional prostaglandin from arachidonic acid[24]. Given the high catechins  
12  
13 content in green tea, it is convincingly expected green tea may be beneficial to relieve menstrual  
14  
15 cramp by inhibiting prostaglandin level. Further studies are needed to specify the role of  
16  
17 catechins in dysmenorrhea. Despite the promising effect of tea drinking in dysmenorrhea, tea  
18  
19 drinking during menstrual period may also have unwanted side effects. Catechins and tannic acid  
20  
21 rich in tea can chelate iron, thus tend to interfere with iron absorption[25, 26]. As menstruating  
22  
23 women lose iron through bleeding, caution of drinking too much tea during menstruation may be  
24  
25 warranted.  
26  
27

28  
29 Several limitations of our study are worth mentioning. First, as our study collected data from  
30  
31 the study population at a single point of time, it may be difficult to establish a causal relationship  
32  
33 between tea drinking and dysmenorrhea. Second, this study did not distinguish secondary  
34  
35 dysmenorrhea from primary dysmenorrhea. However, secondary dysmenorrhea may share some  
36  
37 of the same pathways of pain as the primary dysmenorrhea, with an evidence of an increased  
38  
39 level of prostaglandin in endometriosis and adenomyosis[27, 28]. On the other hand, an animal  
40  
41 study has showed that green tea catechins were able to inhibit the development of endometriosis  
42  
43 through anti-angiogenic effects[29]. Thus, it is possible that green tea may potentially be benefit  
44  
45 to both primary and secondary dysmenorrhea. Third, we did not include information on oral  
46  
47 contraceptive pills use, which may cause potential bias due to residual confounding. However,  
48  
49 this study recruited women of reproductive age who were planning to become pregnant.  
50  
51 Therefore, the number of participants using oral contraceptive pills was negligible. Fourth, the  
52  
53 size of a tea serving and the biochemical quantity in a tea serving vary widely with different  
54  
55 methods of preparing tea between individuals in China. We were unable to standardize the size  
56  
57

1  
2  
3 of tea cups. Finally, the information on dysmenorrhea was based on participants' self-report and,  
4 as such, it was subject to information bias. However, it is difficult to explain why such a bias only  
5 occurred in certain types of tea but not all types.  
6  
7

8  
9 The strengths of this study are also worth noting. The large sample size made the results  
10 more precise. In addition, this study was based on a large cohort, which enables us to involve  
11 more potential confounders in the analyses. The study population was women who were planning  
12 to be pregnant, so they were more likely to remember their health-related behaviors and  
13 characteristics, especially those related to reproduction, such as menstrual characteristics.  
14  
15

16 In conclusion, our study suggests that drinking green tea was associated with lower  
17 prevalence of dysmenorrhea among reproductive-age women in China. On the other hand,  
18 excessive tea drinking may not be advisable, either, as tea may inhibit iron absorption. This  
19 finding will be of considerable clinical and public health significance if the observed association  
20 can be confirmed in future prospective studies.  
21  
22

### 23 **AUTHOR STATEMENT**

24 J.Z, P.Z and Y.T contributed to study conception and design, and contributed to  
25 acquisition of data. X.Z, D.C and R.H contributed to analysis and interpretation of data.  
26 X.Z and R.Z contributed to drafting article. J.Z, and P.Z contributed to revising the article  
27 critically. All authors reviewed the final version of the manuscript and gave final approval  
28 of the version to be published.  
29  
30

### 31 **FUNDING**

32 This work was supported by the National Basic Science Research Program Ministry of  
33 Science and Technology of China (2014CB943300; 2014DFG31460); the Shanghai Municipal  
34 Commission of Health and Family Planning (GWIII-26; 2017ZZ02026); Shanghai Jiao Tong  
35 University 985 Fund and the National Human Genetic Resources Sharing Service Platform  
36 (2005DKA21300).  
37  
38  
39  
40  
41  
42  
43  
44  
45

## DECLARATION OF INTEREST

There is no conflict of interest that could be perceived.

## DATA SHARING

Currently, the Shanghai Birth Cohort data are not yet open to public due to the confidentiality agreement. Data used in this analysis and computing programs are available from the corresponding author upon request.

## ETHICAL APPROVAL

This study is based on the Shanghai Birth Cohort which was approved by the Institutional Review Board of Xinhua Hospital affiliated to the Shanghai Jiao Tong University School of Medicine, and no additional review was needed for this analysis. All participants signed an informed consent.

## ACKNOWLEDGEMENTS

This study was partly funded by the Shanghai Municipal Commission of Health and Family Planning (GWIII-26) and Shanghai Jiao Tong University 985 Fund and supported by the National Human Genetic Resources Sharing Service Platform (2005DKA21300).

## REFERENCES

1. Latthe P, Latthe M, Say L, et al. WHO systematic review of prevalence of chronic pelvic pain: a neglected reproductive health morbidity. *Bmc Public Health* 2006;6.
2. Zhou HG, Yang ZW. Prevalence of dysmenorrhea in female students in a Chinese university: A prospective study. *Health* 2010;2(4):311-4.
3. Dawood M. Dysmenorrhea and prostaglandins. Springer, Boston, MA: Gynecologic endocrinology 1987.
4. Mathias SD, Kuppermann M, Liberman RF, et al. Chronic pelvic pain: Prevalence, health-related quality of life, and economic correlates. *Obstet Gynecol* 1996;87(3):321-7.
5. Dawood MY. Primary dysmenorrhea - Advances in pathogenesis and management. *Obstet Gynecol* 2006;108(2):428-41.
6. Proctor M, Farquhar C. Diagnosis and management of dysmenorrhoea. *BMJ* 2006;332(7550):1134-8B.
7. Zahradnik HP, Hanjalic-Beck A, Groth K. Nonsteroidal anti-inflammatory drugs and hormonal contraceptives for pain relief from dysmenorrhea: a review. *Contraception* 2010;81(3):185-96.
8. Hussain T, Gupta S, Adhami VM, et al. Green tea constituent epigallocatechin-3-gallate selectively inhibits COX-2 without affecting COX-1 expression in human prostate carcinoma cells. *Int J Cancer* 2005;113(4):660-9.
9. Chung MY, Mah E, Masterjohn C, et al. Green tea lowers hepatic cox-2 and prostaglandin e2 in rats with dietary fat-induced nonalcoholic steatohepatitis. *J Med Food* 2015;18(6):648-55.
10. Unsal A, Tozun M, Aslan G, et al. Evaluation of dysmenorrhea among women and its impact on quality of life in a region of western Turkey. *Pak J Med Sci* 2010;26(1):142-7.
11. Hailemeskel S DA, Assefa N. Primary dysmenorrhea magnitude, associated risk factors, and its effect on academic performance: evidence from female university students in Ethiopia. *Int J Womens Health* 2016;8:489.

12. IPAQ. self-admin International Physical Activity Questionnaire  
<https://sites.google.com/site/theipaq/> assessed March 4, 20172010.
13. Berkley K. Primary dysmenorrhea: an urgent mandata. *Pain* 2013;1(1).
14. Patel V, Tanksale V, Sahasrabhojane M, et al. The burden and determinants of dysmenorrhoea: a population-based survey of 2262 women in Goa, India. *BJOG* 2006;113(4):453-63.
15. Tavallaee M, Joffres MR, Corber SJ, et al. The prevalence of menstrual pain and associated risk factors among Iranian women. *J Obstet Gynaecol Res* 2011;37(5):442-51.
16. Ju H, Jones M, Mishra G. The prevalence and risk factors of dysmenorrhea. *Epidemiol Rev* 2014;36(1):104-13.
17. Latthe P, Mignini L, Gray R, et al. Factors predisposing women to chronic pelvic pain: systematic review. *BMJ* 2006;332(7544):749-51.
18. Burnett MA, Antao V, Black A, et al. Prevalence of primary dysmenorrhea in Canada. *J Obstet Gynaecol Can* 2005;27(8):765-70.
19. Altunyurt S, Gol M, Sezer O, et al. Primary dysmenorrhea and uterine blood flow. *J Reprod Med* 2005;50(4):251-5.
20. Andersch B, Milsom I. An epidemiologic-study of young-women with dysmenorrhea. *Am J Obstet Gynecol* 1982;144(6):655-60.
21. Faramarzi M, Salmalian H. Association of psychological and nonpsychological factors with primary dysmenorrhea. *Iran Red Crescent Med J* 2014;16(8):e16307-e.
22. Echeverri D, Montes FR, Cabrera M, et al. Caffeine's Vascular Mechanisms of Action. *Int J Vasc Med* 2010;2010:834060-.
23. Buscicchio G, Piemontese M, Gentilucci L, et al. The effects of maternal caffeine and chocolate intake on fetal heart rate. *J Matern Fetal Neonatal Med* 2012;25(5):528-30.
24. Choi JH, Chang HW, Rhee SJ. Effect of green tea catechin on arachidonic acid cascade in chronic cadmium-poisoned rats. *Asia Pac J Clin Nutr* 2002;11(4):292-7.

- 1  
2  
3 25. Disler PB, Lynch SR, Charlton RW, et al. Effect of tea on iron-absorption. *Gut*  
4  
5 1975;16(3):193-200.  
6  
7 26. Zijp IM, Korver O, Tijburg LBM. Effect of tea and other dietary factors on iron absorption. *Crit*  
8  
9 *Rev Food Sci Nutr* 2000;40(5):371-98.  
10  
11 27. Wu M-H, Lu C-W, Chuang P-C, et al. Prostaglandin E-2: the master of endometriosis? *Exp*  
12  
13 *Biol Med* 2010;235(6):668-77.  
14  
15 28. Rakhila H, Bourcier N, Akoum A, et al. Abnormal expression of prostaglandins e2 and f2  
16  
17 alpha receptors and transporters in patients with endometriosis. *Biomed Res Int* 2015.  
18  
19 29. Xu H, Lui WT, Chu CY, et al. Anti-angiogenic effects of green tea catechin on an experimental  
20  
21 endometriosis mouse model. *Hum Reprod* 2009;24(3):608-18.  
22  
23  
24  
25  
26  
27  
28  
29  
30  
31  
32  
33  
34  
35  
36  
37  
38  
39  
40  
41  
42  
43  
44  
45  
46  
47  
48  
49  
50  
51  
52  
53  
54  
55  
56  
57  
58  
59  
60

**STROBE 2007 (v4) checklist of items to be included in reports of observational studies in epidemiology\***  
**Checklist for cohort, case-control, and cross-sectional studies (combined)**

| Section/Topic             | Item # | Recommendation                                                                                                                                                                                                                                                                                                                                                                                                                                                         | Reported on page # |
|---------------------------|--------|------------------------------------------------------------------------------------------------------------------------------------------------------------------------------------------------------------------------------------------------------------------------------------------------------------------------------------------------------------------------------------------------------------------------------------------------------------------------|--------------------|
| Title and abstract        | 1      | (a) Indicate the study’s design with a commonly used term in the title or the abstract                                                                                                                                                                                                                                                                                                                                                                                 | 2                  |
|                           |        | (b) Provide in the abstract an informative and balanced summary of what was done and what was found                                                                                                                                                                                                                                                                                                                                                                    | 2                  |
| <b>Introduction</b>       |        |                                                                                                                                                                                                                                                                                                                                                                                                                                                                        |                    |
| Background/rationale      | 2      | Explain the scientific background and rationale for the investigation being reported                                                                                                                                                                                                                                                                                                                                                                                   | 4                  |
| Objectives                | 3      | State specific objectives, including any pre-specified hypotheses                                                                                                                                                                                                                                                                                                                                                                                                      | 5                  |
| <b>Methods</b>            |        |                                                                                                                                                                                                                                                                                                                                                                                                                                                                        |                    |
| Study design              | 4      | Present key elements of study design early in the paper                                                                                                                                                                                                                                                                                                                                                                                                                | 5                  |
| Setting                   | 5      | Describe the setting, locations, and relevant dates, including periods of recruitment, exposure, follow-up, and data collection                                                                                                                                                                                                                                                                                                                                        | 5                  |
| Participants              | 6      | (a) <i>Cohort study</i> —Give the eligibility criteria, and the sources and methods of selection of participants. Describe methods of follow-up<br><i>Case-control study</i> —Give the eligibility criteria, and the sources and methods of case ascertainment and control selection. Give the rationale for the choice of cases and controls<br><i>Cross-sectional study</i> —Give the eligibility criteria, and the sources and methods of selection of participants | 5                  |
|                           |        | (b) <i>Cohort study</i> —For matched studies, give matching criteria and number of exposed and unexposed<br><i>Case-control study</i> —For matched studies, give matching criteria and the number of controls per case                                                                                                                                                                                                                                                 |                    |
| Variables                 | 7      | Clearly define all outcomes, exposures, predictors, potential confounders, and effect modifiers. Give diagnostic criteria, if applicable                                                                                                                                                                                                                                                                                                                               | 6-7                |
| Data sources/ measurement | 8*     | For each variable of interest, give sources of data and details of methods of assessment (measurement). Describe comparability of assessment methods if there is more than one group                                                                                                                                                                                                                                                                                   | 6                  |
| Bias                      | 9      | Describe any efforts to address potential sources of bias                                                                                                                                                                                                                                                                                                                                                                                                              | 7                  |
| Study size                | 10     | Explain how the study size was arrived at                                                                                                                                                                                                                                                                                                                                                                                                                              | 7                  |
| Quantitative variables    | 11     | Explain how quantitative variables were handled in the analyses. If applicable, describe which groupings were chosen and why                                                                                                                                                                                                                                                                                                                                           | 6                  |
| Statistical methods       | 12     | (a) Describe all statistical methods, including those used to control for confounding                                                                                                                                                                                                                                                                                                                                                                                  | 7                  |
|                           |        | (b) Describe any methods used to examine subgroups and interactions                                                                                                                                                                                                                                                                                                                                                                                                    | 6                  |
|                           |        | (c) Explain how missing data were addressed                                                                                                                                                                                                                                                                                                                                                                                                                            |                    |
|                           |        | (d) <i>Cohort study</i> —If applicable, explain how loss to follow-up was addressed<br><i>Case-control study</i> —If applicable, explain how matching of cases and controls was addressed                                                                                                                                                                                                                                                                              |                    |

|                          |     |                                                                                                                                                                                                                                                                                                                                                                                                               |       |
|--------------------------|-----|---------------------------------------------------------------------------------------------------------------------------------------------------------------------------------------------------------------------------------------------------------------------------------------------------------------------------------------------------------------------------------------------------------------|-------|
|                          |     | <i>Cross-sectional study</i> —If applicable, describe analytical methods taking account of sampling strategy                                                                                                                                                                                                                                                                                                  |       |
|                          |     | (e) Describe any sensitivity analyses                                                                                                                                                                                                                                                                                                                                                                         |       |
| <b>Results</b>           |     |                                                                                                                                                                                                                                                                                                                                                                                                               |       |
| Participants             | 13* | (a) Report numbers of individuals at each stage of study—eg numbers potentially eligible, examined for eligibility, confirmed eligible, included in the study, completing follow-up, and analysed<br>(b) Give reasons for non-participation at each stage<br>(c) Consider use of a flow diagram                                                                                                               | 7     |
| Descriptive data         | 14* | (a) Give characteristics of study participants (eg demographic, clinical, social) and information on exposures and potential confounders<br>(b) Indicate number of participants with missing data for each variable of interest<br>(c) <i>Cohort study</i> —Summarise follow-up time (eg, average and total amount)                                                                                           | 7-10  |
| Outcome data             | 15* | <i>Cohort study</i> —Report numbers of outcome events or summary measures over time<br><i>Case-control study</i> —Report numbers in each exposure category, or summary measures of exposure<br><i>Cross-sectional study</i> —Report numbers of outcome events or summary measures                                                                                                                             | 7     |
| Main results             | 16  | (a) Give unadjusted estimates and, if applicable, confounder-adjusted estimates and their precision (eg, 95% confidence interval). Make clear which confounders were adjusted for and why they were included<br>(b) Report category boundaries when continuous variables were categorized<br>(c) If relevant, consider translating estimates of relative risk into absolute risk for a meaningful time period | 11-12 |
| Other analyses           | 17  | Report other analyses done—eg analyses of subgroups and interactions, and sensitivity analyses                                                                                                                                                                                                                                                                                                                |       |
| <b>Discussion</b>        |     |                                                                                                                                                                                                                                                                                                                                                                                                               |       |
| Key results              | 18  | Summarise key results with reference to study objectives                                                                                                                                                                                                                                                                                                                                                      | 12-13 |
| Limitations              | 19  | Discuss limitations of the study, taking into account sources of potential bias or imprecision. Discuss both direction and magnitude of any potential bias                                                                                                                                                                                                                                                    | 15-16 |
| Interpretation           | 20  | Give a cautious overall interpretation of results considering objectives, limitations, multiplicity of analyses, results from similar studies, and other relevant evidence                                                                                                                                                                                                                                    | 13-15 |
| Generalisability         | 21  | Discuss the generalisability (external validity) of the study results                                                                                                                                                                                                                                                                                                                                         |       |
| <b>Other information</b> |     |                                                                                                                                                                                                                                                                                                                                                                                                               |       |
| Funding                  | 22  | Give the source of funding and the role of the funders for the present study and, if applicable, for the original study on which the present article is based                                                                                                                                                                                                                                                 | 16    |

\*Give information separately for cases and controls in case-control studies and, if applicable, for exposed and unexposed groups in cohort and cross-sectional studies.

**Note:** An Explanation and Elaboration article discusses each checklist item and gives methodological background and published examples of transparent reporting. The STROBE checklist is best used in conjunction with this article (freely available on the Web sites of PLoS Medicine at <http://www.plosmedicine.org/>, Annals of Internal Medicine at <http://www.annals.org/>, and Epidemiology at <http://www.epidem.com/>). Information on the STROBE Initiative is available at [www.strobe-statement.org](http://www.strobe-statement.org).



# BMJ Open

## Association of Tea Drinking and Dysmenorrhea among reproductive-age women in Shanghai, China (2013-2015): a cross-sectional study

|                                 |                                                                                                                                                                                                                                                                                                                                                                                                                                                                                                                                                                                                                                                                                                                                                                                                                                                                                                                                                                                                             |
|---------------------------------|-------------------------------------------------------------------------------------------------------------------------------------------------------------------------------------------------------------------------------------------------------------------------------------------------------------------------------------------------------------------------------------------------------------------------------------------------------------------------------------------------------------------------------------------------------------------------------------------------------------------------------------------------------------------------------------------------------------------------------------------------------------------------------------------------------------------------------------------------------------------------------------------------------------------------------------------------------------------------------------------------------------|
| Journal:                        | <i>BMJ Open</i>                                                                                                                                                                                                                                                                                                                                                                                                                                                                                                                                                                                                                                                                                                                                                                                                                                                                                                                                                                                             |
| Manuscript ID                   | bmjopen-2018-026643.R1                                                                                                                                                                                                                                                                                                                                                                                                                                                                                                                                                                                                                                                                                                                                                                                                                                                                                                                                                                                      |
| Article Type:                   | Research                                                                                                                                                                                                                                                                                                                                                                                                                                                                                                                                                                                                                                                                                                                                                                                                                                                                                                                                                                                                    |
| Date Submitted by the Author:   | 24-Jan-2019                                                                                                                                                                                                                                                                                                                                                                                                                                                                                                                                                                                                                                                                                                                                                                                                                                                                                                                                                                                                 |
| Complete List of Authors:       | Zhang, Xiaoyu; Ministry of Education-Shanghai Key Laboratory of Children's Environmental Health, Xinhua Hospital, Shanghai Jiao Tong University School of Medicine<br>Zhang, Rongrong; Department of Obstetrics and Gynecology, Xinhua Hospital, Shanghai Jiao Tong University School of Medicine<br>Chen, Dan; Ministry of Education-Shanghai Key Laboratory of Children's Environmental Health, Xinhua Hospital, Shanghai Jiao Tong University School of Medicine<br>Huang, Rong; Ministry of Education-Shanghai Key Laboratory of Children's Environmental Health, Xinhua Hospital, Shanghai Jiao Tong University School of Medicine<br>Tian, Ying; School of Public Health, Shanghai Jiao Tong University<br>Zhang, Ping; Department of Obstetrics and Gynecology, Xinhua Hospital, Shanghai Jiao Tong University School of Medicine<br>Zhang, Jun; Ministry of Education-Shanghai Key Laboratory of Children's Environmental Health, Xinhua Hospital, Shanghai Jiao Tong University School of Medicine |
| <b>Primary Subject Heading</b>: | Obstetrics and gynaecology                                                                                                                                                                                                                                                                                                                                                                                                                                                                                                                                                                                                                                                                                                                                                                                                                                                                                                                                                                                  |
| Secondary Subject Heading:      | Public health                                                                                                                                                                                                                                                                                                                                                                                                                                                                                                                                                                                                                                                                                                                                                                                                                                                                                                                                                                                               |
| Keywords:                       | tea, dysmenorrhea, reproductive age                                                                                                                                                                                                                                                                                                                                                                                                                                                                                                                                                                                                                                                                                                                                                                                                                                                                                                                                                                         |
|                                 |                                                                                                                                                                                                                                                                                                                                                                                                                                                                                                                                                                                                                                                                                                                                                                                                                                                                                                                                                                                                             |

SCHOLARONE™  
Manuscripts

1  
2  
3 **Association of Tea Drinking and Dysmenorrhea among reproductive-age**  
4  
5 **women in Shanghai, China (2013-2015): a cross-sectional study**  
6

7 Xiaoyu Zhang<sup>a</sup>, Rongrong Zhang<sup>b</sup>, Dan Chen<sup>a</sup>, Rong Huang<sup>a</sup>, Ying Tian<sup>c</sup>, Ping Zhang<sup>\*b</sup>, Jun Zhang<sup>\*a</sup> for the  
8  
9 Shanghai Birth Cohort  
10

11 <sup>a</sup> Ministry of Education-Shanghai Key Laboratory of Children's Environmental Health, Xinhua Hospital,  
12  
13 Shanghai Jiao Tong University School of Medicine, Shanghai, 200092, China  
14

15 <sup>b</sup> Department of Obstetrics and Gynecology, Xinhua Hospital, Shanghai Jiao Tong University School of  
16  
17 Medicine, Shanghai, 200092, China  
18

19 <sup>c</sup> School of Public Health, Shanghai Jiao Tong University, Shanghai, 200025, China  
20

21 **Corresponding authors**  
22

23 Address correspondence to J Zhang, Xinhua Hospital, Shanghai Jiao Tong University School of Medicine,  
24  
25 Shanghai, 200092, China. Telephone: (Work) +86-21-2507 8871, (Fax) +86-21-2507 8875. E-mail:  
26  
27 junjimzhang@sina.com; or P Zhang, Department of Obstetrics and Gynecology, Xinhua Hospital,  
28  
29 Shanghai Jiao Tong University School of Medicine, Shanghai, 200092, China. Telephone: (Work)  
30  
31 +8613651788220, (Fax) +8625078200. E-mail: zjqzp@126.com.  
32  
33  
34  
35  
36  
37  
38  
39  
40  
41  
42  
43  
44  
45  
46  
47  
48  
49  
50  
51  
52  
53  
54  
55  
56  
57  
58  
59  
60

## ABSTRACT

**Objectives:** To investigate the association between tea drinking and dysmenorrhea among women of reproductive age.

**Design:** A cross-sectional study based on Shanghai Birth Cohort Study.

**Setting:** Two preconceptional care clinics in Shanghai, China.

**Participants:** 1183 women of reproductive age who sought preconceptional care were recruited from Aug 2013 to April 2015.

**Primary and secondary outcome measures:** Participants were asked if they had pelvic pain associated with menstrual bleeding during the past 12 months and further grade the intensity of menstrual cramp as mild, moderate and severe. Multinomial logistic regression was performed to assess the association of tea drinking and dysmenorrhea. Other information such as demographic and lifestyle factors were also collected and assessed in relation to dysmenorrhea.

**Results:** The prevalence of dysmenorrhea was 57.8%, among whom 10.4% and 3.5% had moderate and severe dysmenorrhea, respectively. Tea drinking was associated with a lower prevalence of dysmenorrhea [adjusted odds ratio (aOR)=0.68, 95%CI: 0.50-0.93 for mild dysmenorrhea; aOR=0.59 (0.32-1.04) for moderate-to-severe dysmenorrhea]. Green tea and oolong tea appeared to have most reduction in the prevalence of dysmenorrhea [For mild dysmenorrhea: green tea: aOR=0.63 (0.44-0.90) and oolong tea: aOR=0.60 (0.35-1.03); for moderate-to-severe dysmenorrhea: green tea: aOR=0.42 (0.20-0.85) and oolong tea: aOR=0.34 (0.11-1.09)].

**Conclusions:** Consumptions of green tea and possibly oolong tea were associated with a lower prevalence of dysmenorrhea.

**Keywords:** tea; dysmenorrhea; reproductive age

**Word accounts:** 3117

**Strengths and limitations of this study**

- This was a large, population-based study, involving extensive potential confounders in the analyses.
- This was a cross-sectional study, and therefore cannot establish a causal relationship.
- The information on dysmenorrhoea was based on participants' self-report.

For peer review only

## INTRODUCTION

Dysmenorrhea refers to pelvic pain during menstruation and can be classified as primary and secondary. Primary dysmenorrhea begins at or shortly after menarche without any evidence of pathology. Pain usually occurs just before or during menstrual period, lasting for 2-3 days.[1] Secondary dysmenorrhea is caused by specific pathological conditions, such as adenomyosis and fibroids, endometriosis, and pelvic inflammatory disease. The onset of secondary dysmenorrhea begins later than the primary dysmenorrhea, usually more than 2 years after menarche.[2] Due to the lack of a standard method grading dysmenorrhea-related pain, the estimated prevalence of dysmenorrhea varied widely, ranging from 16.8% to 81%.[3, 4] A study from China reported that 56.4% of female university students had dysmenorrhea, and among them, 6.5% had very severe (unbearable) symptoms.[5] Dysmenorrhea limits women's daily activity and is associated with absenteeism from school or work.[6] Furthermore, women with primary or secondary dysmenorrhea have higher total health care costs than those without syndromes.[7]

Overproduction of uterine prostaglandins from arachidonic acid through cyclo-oxygenase (COX) pathway has been commonly accepted as the etiology of primary dysmenorrhea.[8] The intensity of painful cramps and dysmenorrhea-related symptoms are proportional to the level of prostaglandin released.[1] Non-steroidal anti-inflammatory drugs (NSAIDs) are commonly prescribed as the first line of treatment for dysmenorrhea, due to its suppression of COX activity. However, the inhibitory effect of NSAIDs on COX-1 brings about several physiological concerns.[2, 9] 10%-20% of women with primary dysmenorrhea fail to respond to or are intolerable to NSAIDs.[2] More and more women with dysmenorrhea resort to complementary and alternative medicine.

Tea has been considered as a medicinal staple for hundreds of years in China, thanks to the potential health benefits of tea flavonoids as antioxidants, anti-carcinogenic and anti-arteriosclerotic agent. Recently, green tea catechins have been demonstrated their inhibitory

1  
2  
3 effect on COX-2 activity.[10, 11] Hence, it is hypothesized that green tea may possibly decrease  
4 prostaglandin level and thereby relieve the severity of dysmenorrhea. However, there is a huge  
5 paucity of epidemiological evidence of the association of tea drinking with dysmenorrhea,  
6 especially green tea consumption, and the results of association are still inconsistent. A  
7 cross-sectional study of 729 Turkish women of reproductive age showed no association between  
8 tea drinking and dysmenorrhea,[12] while another small study with 440 female university  
9 students suggested that students consuming >4 glasses of tea per day had a higher risk of  
10 primary dysmenorrhea than those who did not drink tea.[13] To fill in the knowledge gap, the  
11 present study aims to examine the relationship between tea drinking and dysmenorrhea in  
12 Chinese women of reproductive age.

## 23 **MATERIALS AND METHODS**

24  
25  
26 This study is based on the Shanghai Birth Cohort Study (SBC), which is a hospital-based,  
27 multi-center cohort study. It aims to assess the impacts of genetic, environmental and behavioral  
28 factors on reproductive health, pregnancy outcomes, child growth, development and risks of  
29 diseases. The reader is referred to cohort profile for more details about SBC.[14]

### 34 **Patient and participant involvement**

35  
36  
37 In SBC, couples of reproductive age were recruited at either preconception or first trimester  
38 of pregnancy. Potential participants who agreed to participate in the study would sign an informed  
39 consent during recruitment. Women were followed at several time points, including preconception  
40 (if they were recruited before pregnancy), 1<sup>st</sup>, 2<sup>nd</sup>, 3<sup>rd</sup> trimesters and birth, and husbands were  
41 interviewed at preconception or at birth. Information on demographic characteristics, health  
42 behaviors, social support, reproductive and medical history, and family history of diseases was  
43 collected. Biological specimens were collected at each round of follow-up for further analyses.

44  
45  
46 This study used data from the preconception women who sought preconceptional care at 2  
47 preconceptional care clinics in Shanghai, China, with the following inclusion criteria: 1) married  
48 women with age  $\geq$  20yrs (legal marriage age in China); 2) plan to be pregnant in the following

1  
2  
3 year; 3) registered residents of Shanghai who do not plan to move out in the next 2 years; 4) plan  
4  
5 to give birth in collaborating hospitals. Women who had tried to conceive for 12 months or longer  
6  
7 were excluded from this study.

### 9 **Socio-demographic characteristics**

11 Participants provided information on demographic characteristics and lifestyle factors.  
12  
13 Demographic characteristics include age, ethnicity, education level, income by herself,  
14  
15 household income, as well as height and weight. Body mass index (BMI) was calculated as  
16  
17 weight in kilograms divided by height in meters squared. Lifestyle factors included smoking  
18  
19 history, alcohol intake, consumption of fruits and vegetables, use of dietary supplements and  
20  
21 physical activity which was assessed by International Physical Activity Questionnaire short  
22  
23 version.[15]  
24

26 In addition, the consumptions of caffeinated beverages, such as coffee, soda (Coca-Cola,  
27  
28 Pepsi), and energy drink (e.g., Red Bull), were queried. Specifically, the consumption of tea was  
29  
30 assessed by a structured questionnaire. Participants were asked whether they drank tea in their  
31  
32 daily life. If yes, what type of tea they usually drank, including green, oolong and black tea, which  
33  
34 are commonly consumed in China. They could choose one or multiple categories depending on  
35  
36 their tea drinking habits. Participants were also asked about the number of years of tea drinking  
37  
38 and the choices were “<1 year”, “1-5 years”, “6-10 years” and “>10 years”, and the number of  
39  
40 cups per day.  
41

### 43 **Menstrual characteristics**

45 Women were asked about menstrual characteristics including the onset of menarche,  
46  
47 menstrual cycle length, bleeding duration, volume of menstrual flow and dysmenorrhea. If  
48  
49 participants stated that they had pelvic pain associated with menstrual bleeding during the past  
50  
51 12 months, they were further asked to grade the intensity of menstrual cramp as mild, moderate  
52  
53 and severe. Mild pain was defined as one could feel the pain but did not need further treatment.  
54  
55 Moderate pain was defined as one needed to use therapy or treatment to relieve dysmenorrhea,  
56

1  
2  
3 and severe pain was referred as taking absence of work or bed rest besides treatment. The  
4 method grading pain intensity in this study was modified based on verbal rating scale - a  
5 validated pain scale to evaluate dysmenorrhea.[16] Although verbal rating scale is not as  
6 sensitive as the visual scale or numerical rating scale, which offer a broader spectrum of  
7 differentiating pain intensity, it is easier for participants to fill out and thereby limits missing data.  
8  
9 The regularity of menstrual cycle length was assessed with the question: "Is your menstrual cycle  
10 length regular?". Length variation of 8 days or more was considered as irregular. If irregular, the  
11 durations of the shortest and longest menstrual cycles were asked. If regular, participants stated  
12 the average length of their menstrual cycle. Participants were asked to state their volume of  
13 menstrual flow with four choices: "light", "normal" and "heavy".  
14  
15  
16  
17  
18  
19  
20  
21  
22  
23

### 24 **Statistical analysis**

25  
26 All the analyses were performed using R studio (Version 1.0.136). We described the  
27 distribution of continuous variables (including mean and standard error) according to the severity  
28 of dysmenorrhea, and described the relationship of categorical variables with severity of  
29 dysmenorrhea using contingency tables. In addition, the differences in demographic  
30 characteristics and lifestyle factors according to the severity of dysmenorrhea were analyzed by  
31 Kruskal-Wallis test for categorical variables and one-way ANOVA for continuous variables. The  
32 primary result was the relationship between tea drinking and dysmenorrhea, which was  
33 performed by multinomial logistic regression model. Variables with  $P < 0.05$  of the significance test  
34 for the difference were selected in the final logistic model. Other confounders were selected if  
35 they could change the coefficient by more than 10% compared with unadjusted coefficient.  
36  
37  
38  
39  
40  
41  
42  
43  
44  
45  
46  
47  
48  
49  
50  
51  
52  
53  
54  
55  
56  
57  
58  
59  
60  
 $P < 0.05$  (two sides) was considered statistically significant.

### 50 **RESULTS**

51 A total of 1183 participants were recruited, of whom 23 did not finish the interview and 8  
52 participants did not provide information on severity of dysmenorrhea, leaving 1152 women for the  
53 final analysis.  
54  
55  
56  
57  
58  
59  
60



The prevalence of dysmenorrhea was 57.8% (666/1152). Among them, 86.2% (574) had mild, 10.4% (69) moderate, and 3.5% (23) severe dysmenorrhea. Since the total number of moderate and severe dysmenorrhea was only 99, we combined them together for further analyses.

**Table 1. Demographic and menstrual characteristics according to the severity of dysmenorrhea**

| Variables                               | Dysmenorrhea (N (%)) or (Mean $\pm$ SD) |                |                         | P-value |
|-----------------------------------------|-----------------------------------------|----------------|-------------------------|---------|
|                                         | No (486)                                | Mild (574)     | Moderate-to-severe (92) |         |
| <b>Age (years)</b>                      | 29.9 $\pm$ 3.5                          | 29.2 $\pm$ 3.0 | 28.4 $\pm$ 2.4          | <0.001  |
| <b>BMI (kg/m<sup>2</sup>)</b>           | 21.2 $\pm$ 2.9                          | 20.9 $\pm$ 2.5 | 20.3 $\pm$ 3.0          | 0.021   |
| <b>Race</b>                             |                                         |                |                         | 0.733   |
| Han                                     | 474 (42.2)                              | 559 (49.8)     | 89 (7.9)                |         |
| Others                                  | 12 (40.0)                               | 15 (50.0)      | 3 (10.0)                |         |
| <b>Education</b>                        |                                         |                |                         | 0.533   |
| Junior college                          | 96 (42.7)                               | 113 (50.2)     | 16 (7.1)                |         |
| Undergraduate                           | 302 (43.0)                              | 346 (49.2)     | 55 (7.8)                |         |
| Graduate                                | 88 (39.3)                               | 115 (51.3)     | 21 (9.4)                |         |
| <b>Home income</b>                      |                                         |                |                         | 0.646   |
| < ¥100K                                 | 31 (36.9)                               | 48 (57.1)      | 5 (6.0)                 |         |
| ¥100-150K                               | 77 (41.4)                               | 96 (51.6)      | 13 (7.0)                |         |
| ≥ ¥150K                                 | 357 (43.9)                              | 392 (48.2)     | 65 (8.0)                |         |
| <b>Personal income</b>                  |                                         |                |                         | 0.622   |
| < ¥100K                                 | 241 (40.3)                              | 315 (52.7)     | 42 (7.0)                |         |
| ¥100-150K                               | 159 (45.2)                              | 161 (45.7)     | 32 (9.1)                |         |
| ≥ ¥150K                                 | 62 (43.7)                               | 68 (47.9)      | 12 (8.5)                |         |
| <b>Onset of menarche (years)</b>        | 13.4 $\pm$ 1.4                          | 13.4 $\pm$ 1.3 | 13.4 $\pm$ 1.3          | 0.763   |
| <b>Length of menstrual cycle (days)</b> | 29.8 $\pm$ 2.9                          | 29.7 $\pm$ 2.9 | 30.3 $\pm$ 7.7          | 0.308   |
| <b>Bleeding duration (days/month)</b>   | 5.6 $\pm$ 1.4                           | 5.7 $\pm$ 1.2  | 5.7 $\pm$ 1.3           | 0.268   |
| <b>Volume of menstrual flow</b>         |                                         |                |                         | <0.001  |
| Light                                   | 48(48.0)                                | 44(44.0)       | 8(8.0)                  |         |
| Normal                                  | 419(43.2)                               | 487(50.2)      | 65(6.7)                 |         |
| Heavy                                   | 18(23.1)                                | 41(52.6)       | 19(24.4)                |         |
| <b>Regularity of menstrual cycle</b>    |                                         |                |                         | 0.773   |
| Regular                                 | 393 (41.7)                              | 479 (50.8)     | 71 (7.5)                |         |
| Irregular                               | 93 (44.5)                               | 95 (45.5)      | 21 (10.0)               |         |
| <b>Having had a pregnancy</b>           |                                         |                |                         | <0.001  |
| No                                      | 244 (37.2)                              | 344 (52.4)     | 68 (10.4)               |         |
| Yes                                     | 241 (48.7)                              | 230 (46.5)     | 24 (4.8)                |         |

P-value was obtained by Kruskal-Wallis test for categorical variables and one-way ANOVA for continuous variables

1  
2  
3 Table 1 presents the demographic and menstrual characteristics of the study population  
4 according to the severity of dysmenorrhea. The average age of all the 1152 participants was 29.4  
5  $\pm$  3.2 years, ranging from 21 to 44 years. 5% of women were 35 years or older. Women with  
6 moderate to severe dysmenorrhea had a mean age of 28.4  $\pm$  2.4 years, in comparison to 29.9  
7  $\pm$  3.5 years in women without dysmenorrhea. The average BMI was 21.0  $\pm$  2.7 kg/m<sup>2</sup>, with 7.2%  
8 being overweight or obese (BMI  $\geq$  25 kg/m<sup>2</sup>). Non-dysmenorrhea group had a higher BMI than  
9 mild-dysmenorrhea group, followed by moderate-to-severe group. There was no difference in  
10 education, women's income and household income among the three groups.  
11  
12  
13  
14  
15  
16  
17  
18  
19

20 The average age of the onset of menarche was 13.4  $\pm$  1.3 years. The average length of  
21 menstrual cycle and bleeding was 29.8  $\pm$  3.5 days and 5.7  $\pm$  1.3 days, respectively, among all the  
22 women of reproductive age. The prevalence of moderate-to-severe dysmenorrhea was higher in  
23 women with heavy menstrual flow, compared with women with light and normal menses.  
24 Multiparous women were less likely to have dysmenorrhea.  
25  
26  
27  
28  
29

30 Table 2 presents the distribution of lifestyle factors according to the intensity of  
31 dysmenorrhea. Very few women smoked. There was no association between smoking and  
32 dysmenorrhea. However, women who were exposed to second-hand smoke from her husband,  
33 roommates or colleagues were more likely to have dysmenorrhea.  
34  
35  
36  
37  
38

39 Consumptions of vegetables, fruits, dietary supplements of Vitamin E and fish oil were not  
40 associated with the severity of menstrual pain (Table 2). However, the prevalence of  
41 moderate-to-severe dysmenorrhea was slightly higher in women who did not take Vitamin E,  
42 compared with Vitamin E consumers (8.8% versus 4.0%). Physical activity (vigorous, moderate  
43 or walking) was not associated with the severity of dysmenorrhea.  
44  
45  
46  
47  
48

49 The prevalence of tea drinking was 34.5% (398 of 1152) among women with reproductive  
50 age, and the number of tea drinkers according to the severity of dysmenorrhea was shown in  
51 Table 3. Table 4 shows the association between tea drinking and dysmenorrhea. After adjusting  
52 for age, BMI, personal income, ever pregnant, consumption of caffeinated beverages (coffee,  
53  
54  
55  
56  
57  
58  
59  
60

**Table 2. Lifestyle factors according to the severity of dysmenorrhea**

| Variables                               | Dysmenorrhea (N (%)) |            |                         | P-value |
|-----------------------------------------|----------------------|------------|-------------------------|---------|
|                                         | No (486)             | Mild (574) | Moderate-to-severe (92) |         |
| <b>Smoking now</b>                      |                      |            |                         | 0.193   |
| No                                      | 481 (42.3)           | 569 (50.0) | 88 (7.7)                |         |
| Yes                                     | 5 (35.7)             | 5 (35.7)   | 4 (28.6)                |         |
| <b>Used to smoke</b>                    |                      |            |                         | 0.604   |
| No                                      | 471 (42.2)           | 557 (50.0) | 87 (7.8)                |         |
| Yes                                     | 9 (47.4)             | 9 (47.4)   | 1 (5.3)                 |         |
| <b>Second-hand smoke</b>                |                      |            |                         | <0.001  |
| No                                      | 365 (46.5)           | 363 (46.2) | 57 (7.3)                |         |
| Yes                                     | 121 (33.2)           | 209 (57.3) | 35 (9.6)                |         |
| <b>Alcohol drinking within one year</b> |                      |            |                         | 0.110   |
| No                                      | 325 (43.6)           | 366 (49.1) | 54 (7.2)                |         |
| Yes                                     | 160 (39.4)           | 208 (51.2) | 38 (9.4)                |         |
| <b>Current alcohol drinking</b>         |                      |            |                         | 0.676   |
| No                                      | 469 (42.3)           | 551 (49.7) | 88 (7.9)                |         |
| Yes                                     | 17 (39.5)            | 22 (51.2)  | 4 (9.3)                 |         |
| <b>Vitamin E</b>                        |                      |            |                         | 0.065   |
| No                                      | 392 (41.3)           | 474 (49.9) | 84 (8.8)                |         |
| Yes                                     | 81 (46.8)            | 85 (49.1)  | 7 (4.0)                 |         |
| <b>Supplementation of fish oil</b>      |                      |            |                         | 0.874   |
| No                                      | 438 (42.0)           | 519 (49.8) | 85 (8.2)                |         |
| Yes                                     | 33 (42.9)            | 38 (49.4)  | 6 (7.8)                 |         |
| <b>Leaf vegetables</b>                  |                      |            |                         | 0.359   |
| < 1 per week                            | 8 (57.1)             | 6 (42.9)   | 0 (0)                   |         |
| 1-3 per week                            | 73 (42.4)            | 81 (47.1)  | 18 (10.5)               |         |
| 4-7 per week                            | 264 (40.7)           | 330 (50.9) | 54 (8.3)                |         |
| ≥ 2 per day                             | 137 (44.1)           | 154 (49.5) | 20 (6.4)                |         |
| <b>Fruits</b>                           |                      |            |                         | 0.262   |
| < 1 per week                            | 8 (32.0)             | 15 (60.0)  | 2 (8.0)                 |         |
| 1-3 per week                            | 90 (39.1)            | 113 (49.1) | 27 (11.7)               |         |
| 4-7 per week                            | 286 (43.4)           | 331 (50.2) | 42 (6.4)                |         |
| ≥ 2 per day                             | 99 (43.2)            | 109 (47.6) | 21 (9.2)                |         |
| <b>Vigorous physical activity</b>       |                      |            |                         | 0.460   |
| No                                      | 393 (41.6)           | 475 (50.3) | 77(8.1)                 |         |
| Yes                                     | 85 (44.7)            | 90 (47.4)  | 15(7.9)                 |         |
| <b>Moderate physical activity</b>       |                      |            |                         | 0.456   |
| No                                      | 300 (41.3)           | 366 (50.3) | 61 (8.4)                |         |
| Yes                                     | 171 (43.4)           | 193 (49.0) | 30 (7.6)                |         |
| <b>Walk</b>                             |                      |            |                         | 0.195   |
| No                                      | 24 (57.1)            | 12 (28.6)  | 6 (14.3)                |         |
| Yes                                     | 409 (41.6)           | 495 (50.4) | 78 (7.9)                |         |

P-value was obtained by Kruskal-Wallis test

Soda or energy drink), alcohol drinking during last 12 months, second-hand smoke, supplementation of fish oil, consumption of leaf vegetable, moderate physical activity and walking, tea drinking was associated with a 32% lower prevalence of mild dysmenorrhea. The aOR of mild dysmenorrhea was attenuated by half in women who drank tea for 3-5 cups per day compared with women who did not drink tea, whereas we did not find such relationship in higher tea consumers ( $\geq 6$  cups/day). We did not find a relationship between number of years of tea drinking and severity of dysmenorrhea among tea drinkers. Consumption of green tea was associated with a lower prevalence of dysmenorrhea, and the relationship was stronger in moderate-to-severe dysmenorrhea than in mild dysmenorrhea, which is shown in Table 5. Consumption of oolong tea was associated with a lower prevalence of dysmenorrhea but the association did not reach statistical significance.

**Table 3. Caffeinated beverages according to the severity of dysmenorrhea**

| Variables                      | Dysmenorrhea |            |                         | P-value |
|--------------------------------|--------------|------------|-------------------------|---------|
|                                | No (486)     | Mild (574) | Moderate-to-severe (92) |         |
| <b>Tea</b>                     |              |            |                         | 0.216   |
| No                             | 308 (40.8)   | 384 (50.9) | 62 (8.2)                |         |
| Yes                            | 178 (44.7)   | 190 (47.7) | 30 (7.5)                |         |
| <b>Green tea</b>               |              |            |                         | 0.012   |
| No                             | 347 (40.2)   | 443 (51.3) | 74 (8.6)                |         |
| Yes                            | 139 (48.3)   | 131 (45.5) | 18 (6.3)                |         |
| <b>Black tea</b>               |              |            |                         | 0.337   |
| No                             | 413 (42.7)   | 481 (49.7) | 74 (7.6)                |         |
| Yes                            | 73 (39.7)    | 93 (50.5)  | 18 (9.8)                |         |
| <b>Oolong tea</b>              |              |            |                         | 0.033   |
| No                             | 434 (41.3)   | 528 (50.3) | 88 (8.4)                |         |
| Yes                            | 52 (51.0)    | 46 (45.1)  | 4 (3.9)                 |         |
| <b>Coffee</b>                  |              |            |                         | 0.027   |
| No                             | 275 (43.9)   | 317 (50.6) | 34 (5.4)                |         |
| Yes                            | 211 (40.1)   | 257 (48.9) | 58 (11.0)               |         |
| <b>Soda (Coca-Cola, Pepsi)</b> |              |            |                         | 0.047   |
| No                             | 335 (43.7)   | 381 (49.7) | 51 (6.6)                |         |
| Yes                            | 151 (39.2)   | 193 (50.1) | 41 (10.6)               |         |
| <b>Energy beverages</b>        |              |            |                         | 0.050   |
| No                             | 462 (42.7)   | 539 (49.8) | 81 (7.5)                |         |
| Yes                            | 24 (34.3)    | 35 (50.0)  | 11 (15.7)               |         |

P-value was obtained by Kruskal-Wallis test

**Table 4. Relationship of tea drinking and dysmenorrhea**

| Variable                               | Crude model (cOR) |                 |                         | Adjusted model (aOR) <sup>a</sup> |                         |
|----------------------------------------|-------------------|-----------------|-------------------------|-----------------------------------|-------------------------|
|                                        | No (486)          | Mild (574)      | Moderate-to-severe (92) | Mild (574)                        | Moderate-to-severe (92) |
| <b>Tea</b>                             |                   |                 |                         |                                   |                         |
| No                                     | 1                 | 1               | 1                       | 1                                 | 1                       |
| Yes                                    | 1                 | 0.86(0.66-1.10) | 0.84(0.52-1.34)         | 0.68(0.50-0.93)                   | 0.59(0.32-1.04)         |
| <b>Number of cups/day</b>              |                   |                 |                         |                                   |                         |
| 0 per day                              | 1                 | 1               | 1                       | 1                                 | 1                       |
| 1-2 cups/day                           | 1                 | 0.97(0.71-1.33) | 1.06(0.61-1.84)         | 0.80(0.55-1.17)                   | 0.71(0.36-1.41)         |
| 3-5 cups/day                           | 1                 | 0.66(0.44-0.98) | 0.57(0.25-1.31)         | 0.49(0.31-0.79)                   | 0.39(0.15-1.00)         |
| ≥ 6 cups/day                           | 1                 | 0.80(0.43-1.50) | 0.71(0.21-2.45)         | 0.75(0.37-1.53)                   | 0.77(0.21-2.86)         |
| <b>Number of years of tea drinking</b> |                   |                 |                         |                                   |                         |
| < 1 year                               | 1                 | 1               | 1                       | 1                                 | 1                       |
| 1-5 years                              | 1                 | 0.64(0.36-1.13) | 1.41(0.44-4.50)         | 0.53(0.26-1.07)                   | 2.13(0.40-11.2)         |
| ≥ 6 years                              | 1                 | 0.61(0.33-1.14) | 0.71(0.18-2.73)         | 0.54(0.24-1.25)                   | 1.67(0.25-11.2)         |

<sup>a</sup> model 1 was a crude multinomial logistic regression which was used for each outcome

<sup>b</sup> model 2 was an adjusted multinomial logistic regression model for each outcome, and was adjusted for age, BMI, personal income, ever pregnant, caffeinated beverages drinking, alcohol drinking now and during last one year, second-hand smoke, supplementation of fish oil, consumption of leaf vegetables, moderate- and walk-intensity physical activity.

**Table 5. Odds ratios for dysmenorrhea according to consumption of type of tea beverage/caffeinated beverage**

| Variable                    | Crude model (cOR) |                 |                         | Adjusted model (aOR) |                         |
|-----------------------------|-------------------|-----------------|-------------------------|----------------------|-------------------------|
|                             | No (486)          | mild (574)      | Moderate-to-severe (92) | Mild (574)           | Moderate-to-severe (92) |
| <b><sup>a</sup> Model 1</b> |                   |                 |                         |                      |                         |
| Green tea                   | 1                 | 0.74(0.56-0.97) | 0.61(0.35-1.05)         | 0.63(0.44-0.90)      | 0.42(0.20-0.85)         |
| Black tea                   | 1                 | 1.09(0.78-1.53) | 1.38(0.78-2.44)         | 1.27(0.81-2.00)      | 1.96(0.94-4.10)         |
| Oolong tea                  | 1                 | 0.73(0.48-1.10) | 0.38(0.13-1.08)         | 0.60(0.35-1.03)      | 0.34(0.11-1.09)         |
| <b><sup>b</sup> Model 2</b> |                   |                 |                         |                      |                         |
| Coffee                      | 1                 | 1.06(0.83-1.35) | 2.22(1.40-3.52)         | 1.08(0.80-1.44)      | 2.11(1.22-3.62)         |
| Soda                        | 1                 | 1.12(0.87-1.45) | 1.78(1.13-2.81)         | 1.05(0.76-1.44)      | 1.20(0.69-2.10)         |
| Energy beverages            | 1                 | 1.25(0.73-2.13) | 2.61(1.23-5.54)         | 0.91(0.50-1.69)      | 1.65(0.66-4.15)         |

<sup>a</sup> model 1 was a multinomial logistic regression model which was used for each type of tea beverage separately, and was further adjusted for other types of tea beverages, age, BMI, personal income, ever pregnant, caffeinated beverages drinking, alcohol drinking now and during last one year, second-hand smoke, supplementation of fish oil, consumption of leaf vegetables, moderate- and walk-intensity physical activity

<sup>b</sup> model 2 was a multinomial logistic regression model which was used for each caffeinated beverage separately, and was further adjusted for other caffeinated beverages, age, BMI, personal income, ever pregnant, second-hand smoke, walk-intensity physical activity and tea drinking

1  
2  
3 As for the relationship between each caffeine-contained beverage (coffee, Soda and energy  
4 drink) and severity of dysmenorrhea (Table 5), women with moderate-to-severe dysmenorrhea  
5 were twice more likely to be coffee drinkers than women without dysmenorrhea. However, after  
6 adjusting for potential confounders, consumption of neither soda nor energy beverages was  
7 associated with prevalence of moderate-to-severe dysmenorrhea. However, after  
8 adjusting for potential confounders, consumption of neither soda nor energy beverages was  
9 associated with prevalence of moderate-to-severe dysmenorrhea.  
10  
11  
12

## 13 **DISCUSSION**

14  
15 The present study found that more than half of Chinese reproductive age women (57.8%)  
16 had some degree of dysmenorrhea. Exposure to second-hand smoke or consumption of coffee  
17 were positively associated with moderate-to-severe dysmenorrhea. After adjustment for the  
18 potential confounders, consumptions of green tea and possibly oolong tea were associated with  
19 lower prevalence of dysmenorrhea.  
20  
21  
22  
23  
24  
25

26 The prevalence of dysmenorrhea in our population was consistent with previous studies. It  
27 was reported that at least 50% of women around the world[17] and 56.4% of university students  
28 in China suffered from dysmenorrhea.[5] However, the prevalence of severe dysmenorrhea in  
29 this study was slightly lower than the previous study (3.5% vs 6.5%, respectively),[5] which may  
30 be explained by the age difference between the study populations ( $29.4 \pm 3.2$  years in the current  
31 study versus  $20.3 \pm 1.3$  in Zhou's study[5]). Previous literature indicated that menstrual pain was  
32 alleviated to some degree with advancing age.[12, 18, 19]  
33  
34  
35  
36  
37  
38  
39  
40

41 The relationships between dysmenorrhea and menstrual characteristics (such as onset of  
42 menarche, regular menses, bleeding duration) are still uncertain.[20] Some studies reported that  
43 older age at menarche was associated with a decreased risk of dysmenorrhea,[18, 21] while  
44 others showed no association.[12, 22] Unsal et al. found that menstrual irregularity was one of  
45 risk factors for dysmenorrhea [OR=1.90 (1.22-32.95)].[12] As for blood flow, some studies  
46 showed that reduced menstrual flow may be a sign of uterine constriction and it was associated  
47 with cramp pain[1, 23] while others showed that the severity of dysmenorrhea increased with  
48 increasing volume of blood flow.[5, 24] Our study was consistent with the latter finding, that is,  
49  
50  
51  
52  
53  
54  
55  
56  
57  
58  
59  
60

1  
2  
3 women with heavy blood flow were more likely to have dysmenorrhea. However, we did not find  
4 any other relationship between menstrual health and dysmenorrhea. Interestingly, our result  
5 showed that pregnancy history was inversely associated with dysmenorrhea, in line with previous  
6 studies.[12, 18]  
7  
8  
9

10  
11 Our results showed a tendency towards dysmenorrhea relief when women drank tea in daily  
12 life. Those who consumed 3-5 cups/day of tea were 51% less likely to report having mild  
13 dysmenorrhea than non-drinkers. The observation of no relationship between high tea drinking  
14 ( $\geq 6$  cups/day) and dysmenorrhea may be true or due to chance; only 45 participants stated tea  
15 consumption of  $\geq 6$  cups/day. In contrast, a small cross-sectional study with randomly selected  
16 440 female university students in Ethiopia suggested that people drinking tea for more than 4  
17 glasses/day has 19 times higher prevalence of dysmenorrhea than non-drinkers, the  
18 corresponding aOR was 18.94 (2.19-163.73).[13] However, the very wide confidence interval  
19 indicates that the conclusion is uncertain.  
20  
21  
22  
23  
24  
25  
26  
27  
28  
29

30 Among three types of tea, our study showed that consumption of green tea may be beneficial  
31 for relief of dysmenorrhea while consumption of black tea was not. The latter finding is consistent  
32 with the results from a Turkey study - a cross-sectional study with 729 reproductive-age women,  
33 which found no association between tea consumption and dysmenorrhea,[12] as the traditional  
34 tea in Turkey is black tea. Consumption of oolong tea had a borderline association with a lower  
35 prevalence of dysmenorrhea, which may be ascribed to a small sample size. Our study may be  
36 underpowered to detect the desired difference between oolong tea drinkers and non-drinkers.  
37  
38  
39  
40  
41  
42  
43  
44

45 To explore whether caffeine in tea was responsible to the relief of dysmenorrhea, we  
46 examined the association between consumption of caffeinated beverages, especially coffee, and  
47 dysmenorrhea. Unlike tea, consumption of coffee was positively related to the severity of  
48 dysmenorrhea. Unlike tea, consumption of coffee was positively related to the severity of  
49 dysmenorrhea in this study after adjustment of potential confounders. Previous studies showed  
50 that the risk of dysmenorrhea was twice as high in high caffeine consumers ( $\geq 300$  mg/day)  
51 compared with low/moderate caffeine consumers ( $< 300$  mg/day) [OR=1.97 (1.09-3.59)][25] and  
52  
53  
54  
55  
56  
57  
58  
59  
60



1  
2  
3 in coffee consumers [OR=2.08 (1.34-3.24)].[12] The mechanism through which caffeine could  
4 aggravate cramp-like pain is uncertain and further studies are warranted. One possible  
5 mechanism is the vasoconstricting action of caffeine.[26] A study in pregnant women indicates  
6 that caffeine stimulates uterine muscle and, consequently, causes increased uterine  
7 contraction.[27] Uterine hypercontraction reduces blood flow and results in pain.[1]

8  
9  
10  
11  
12  
13 Instead, catechins in green tea might partly explain the observed relationship with relieved  
14 severity of dysmenorrhea. The extent of the oxidative processing (also called “fermentation”)  
15 differs among three types of tea - green tea is minimally processed, while black tea is completely  
16 fermented. Hence, catechins are rich in green tea followed by oolong tea, while much lower in  
17 black tea, as it is unstable and sensitive to oxidization. A number of animal and *in vitro* studies  
18 suggest that green tea extract (catechins) is an effective inhibitor of COX-2 but not COX-1[10, 11]  
19 thereby preventing overproduction of uterine prostaglandin levels, a major pathogenesis of  
20 primary dysmenorrhea. In addition, catechins inhibit the activity of phospholipase A2, an enzyme  
21 involved in the production of arachidonic acid, and consequently decreases the production of  
22 additional prostaglandin from arachidonic acid.[28] Given the high catechins content in green tea,  
23 it is convincingly expected green tea may be beneficial to relieve menstrual cramp by inhibiting  
24 prostaglandin level.

25  
26  
27  
28  
29  
30  
31  
32  
33  
34  
35  
36  
37  
38  
39  
40  
41  
42  
43  
44  
45  
46  
47  
48  
49  
50  
51  
52  
53  
54  
55  
56  
57  
58  
59  
60  
Further studies are needed to specify the role of catechins in dysmenorrhea. Despite the  
promising effect of tea drinking in dysmenorrhea, tea drinking during menstrual period may also  
have unwanted side effects. Catechins and tannic acid rich in tea can chelate iron, thus tend to  
interfere with iron absorption.[29-31] As menstruating women lose iron through bleeding, caution  
of drinking too much tea during menstruation may be warranted.

Several limitations of our study are worth mentioning. First, as our study collected data from  
the study population at a single point of time, it may be difficult to establish a causal relationship  
between tea drinking and dysmenorrhea. Second, this study did not distinguish secondary  
dysmenorrhea from primary dysmenorrhea. However, secondary dysmenorrhea may share some



1  
2  
3 of the same pathways of pain as the primary dysmenorrhea, with an evidence of an increased  
4 level of prostaglandin in endometriosis and adenomyosis.[32, 33] On the other hand, an animal  
5 study has shown that green tea catechins inhibited the development of endometriosis through  
6 anti-angiogenic effects.[34] Thus, it is possible that green tea may potentially be beneficial to both  
7 primary and secondary dysmenorrhea. Third, we did not include information on oral contraceptive  
8 pills use, which may cause potential bias due to residual confounding. However, this study  
9 recruited women of reproductive age who were planning to become pregnant. Therefore, the  
10 number of participants using oral contraceptive pills was negligible. Fourth, the size of a tea  
11 serving and the biochemical quantity in a tea serving vary widely with different methods of  
12 preparing tea between individuals in China. We were unable to standardize the size of tea cups.  
13 Finally, the information on dysmenorrhea was based on participants' self-report and, as such, it  
14 was subject to information bias. However, it is difficult to explain why such a bias only occurred in  
15 certain types of tea but not all types.

16  
17  
18  
19  
20  
21  
22  
23  
24  
25  
26  
27  
28  
29  
30  
31  
32  
33  
34  
35  
36  
37  
38  
39  
40  
41  
42  
43  
44  
45  
46  
47  
48  
49  
50  
51  
52  
53  
54  
55  
56  
57  
58  
59  
60  
The strengths of this study are also worth noting. The large sample size made the results  
more precise. In addition, this study was based on a large cohort, which enables us to involve  
more potential confounders in the analyses. The study population was women who were planning  
to be pregnant, so they were more likely to remember their health-related behaviors and  
characteristics, especially those related to reproduction, such as menstrual characteristics.

In conclusion, our study suggests that drinking green tea was associated with a lower  
prevalence of dysmenorrhea among reproductive-age women in China. On the other hand,  
excessive tea drinking may not be advisable, either, as tea may inhibit iron absorption. Given the  
scarcity of epidemiological evidence of tea drinking and dysmenorrhea, this study gives new  
insights in the possible role of green tea on the relief of dysmenorrhea. Cohort studies and  
subsequent randomized controlled trials are needed to confirm this finding, which may have  
important clinical and public health significance.

## **AUTHOR STATEMENT**

1  
2  
3 J.Z, P.Z and Y.T contributed to study conception and design, and contributed to acquisition  
4 of data. X.Z, D.C and R.H contributed to analysis and interpretation of data. X.Z and R.Z  
5 contributed to drafting article. J.Z, and P.Z contributed to revising the article critically. All authors  
6 reviewed the final version of the manuscript and gave final approval of the version to be  
7 published.  
8  
9  
10  
11  
12

### 13 **FUNDING**

14  
15 This work was supported by the National Basic Science Research Program Ministry of  
16 Science and Technology of China (2014CB943300; 2014DFG31460); the Shanghai Municipal  
17 Commission of Health and Family Planning (GWIII-26; 2017ZZ02026); Shanghai Jiao Tong  
18 University 985 Fund and the National Human Genetic Resources Sharing Service Platform  
19 (2005DKA21300).  
20  
21  
22  
23  
24  
25

### 26 **DECLARATION OF INTEREST**

27  
28 There is no conflict of interest that could be perceived.  
29

### 30 **DATA SHARING**

31  
32 Currently, the Shanghai Birth Cohort data are not yet open to public due to the confidentiality  
33 agreement. Data used in this analysis and computing programs are available from the  
34 corresponding author upon request.  
35  
36  
37  
38

### 39 **ETHICAL APPROVAL**

40  
41 This study is based on the Shanghai Birth Cohort which was approved by the Institutional  
42 Review Board of Xinhua Hospital affiliated to the Shanghai Jiao Tong University School of  
43 Medicine, and no additional review was needed for this analysis. All participants signed an  
44 informed consent.  
45  
46  
47  
48

### 49 **ACKNOWLEDGEMENTS**

50  
51 This study was partly funded by the Shanghai Municipal Commission of Health and Family  
52 Planning (GWIII-26) and Shanghai Jiao Tong University 985 Fund and supported by the National  
53 Human Genetic Resources Sharing Service Platform (2005DKA21300).  
54  
55  
56

## REFERENCES

1. Dawood MY. Primary dysmenorrhea - Advances in pathogenesis and management. *Obstet Gynecol* 2006;108(2):428-41.
2. Proctor M, Farquhar C. Diagnosis and management of dysmenorrhoea. *BMJ* 2006;332(7550):1134-8B.
3. Latthe P, Latthe M, Say L, et al. WHO systematic review of prevalence of chronic pelvic pain: a neglected reproductive health morbidity. *Bmc Public Health* 2006;6.
4. Wong, CL. Health-related quality of life among Chinese adolescent girls with Dysmenorrhoea. *Reprod Health* 2018;15(1):80.
5. Zhou HG, Yang ZW. Prevalence of dysmenorrhea in female students in a Chinese university: A prospective study. *Health* 2010;2(4):311-4.
6. Vincenzo De Sanctis MD, Soliman A, Bernasconi S, et al. Primary dysmenorrhea in adolescents: prevalence, impact and recent knowledge. *Pediatr Endocrinol Rev* 2015;13(2).
7. Akiyama S, Tanaka E, Cristeau O, et al. Evaluation of the treatment patterns and economic burden of dysmenorrhea in Japanese women, using a claims database. *Clinicoecon Outcomes Res* 2017;9:295.
8. Iacovides S, Avidon I, Baker FC. What we know about primary dysmenorrhea today: a critical review. *Hum Reprod Update* 2015;21(6):762-78.
9. Zahradnik HP, Hanjalic-Beck A, Groth K. Nonsteroidal anti-inflammatory drugs and hormonal contraceptives for pain relief from dysmenorrhea: a review. *Contraception* 2010;81(3):185-96.
10. Hussain T, Gupta S, Adhami VM, et al. Green tea constituent epigallocatechin-3-gallate selectively inhibits COX-2 without affecting COX-1 expression in human prostate carcinoma cells. *Int J Cancer* 2005;113(4):660-9.
11. Chung MY, Mah E, Masterjohn C, et al. Green Tea Lowers Hepatic COX-2 and Prostaglandin E2 in Rats with Dietary Fat-Induced Nonalcoholic Steatohepatitis. *J med Food* 2015;18(6):648-55.

12. Unsal A, Tozun M, Aslan G, et al. Evaluation of dysmenorrhea among women and its impact on quality of life in a region of western Turkey. *Pak J Med Sci* 2010;26(1):142-7.
13. Hailemeskel S DA, Assefa N. Primary dysmenorrhea magnitude, associated risk factors, and its effect on academic performance: evidence from female university students in Ethiopia. *Int J Womens Health* 2016;8:489.
14. IPAQ. self-admin International Physical Activity Questionnaire  
<https://sites.google.com/site/theipaq/> assessed March 4, 20172010.
15. Bourdel N, Alves J, Pickering G, et al. Systematic review of endometriosis pain assessment: how to choose a scale? *Hum Reprod Update* 2014;21(1):136-52.
16. Berkley K. Primary dysmenorrhea: an urgent mandata. *Pain*. 2013;1(1).
17. Patel V, Tanksale V, Sahasrabhojane M, et al. The burden and determinants of dysmenorrhoea: a population-based survey of 2262 women in Goa, India. *BJOG* 2006;113(4):453-63.
18. Tavallae M, Joffres MR, Corber SJ, et al. The prevalence of menstrual pain and associated risk factors among Iranian women. *J Obstet Gynaecol Res* 2011;37(5):442-51.
19. Ju H, Jones M, Mishra G. The Prevalence and Risk Factors of Dysmenorrhea. *Epidemiol Rev* 2014;36(1):104-13.
20. Latthe P, Mignini L, Gray R, et al. Factors predisposing women to chronic pelvic pain: systematic review. *BMJ* 2006;332(7544):749-51.
21. Burnett MA, Antao V, Black A, et al. Prevalence of primary dysmenorrhea in Canada. *Journal of obstetrics and gynaecology Canada*. *J Obstet Gynaecol Can* 2005;27(8):765-70.
22. Altunyurt S, Gol M, Sezer O, et al. Primary dysmenorrhea and uterine blood flow. *J Reprod Med* 2005;50(4):251-5.
23. Osayande, AS., Mehulic, S. Diagnosis and initial management of dysmenorrhea. *Am Fam Physician* 2014;89(5):341-6.
24. Faramarzi M, Salmalian H. Association of psychologic and nonpsychologic factors with

- 1  
2  
3 primary dysmenorrhea. *Iran Red Crescent Med J* 2014;16(8).  
4  
5 25. Echeverri D, Montes FR, Cabrera M, et al. Caffeine's Vascular Mechanisms of Action. *Int J*  
6  
7 *Vasc Med* 2010;2010.  
8  
9 26. Buscicchio G, Piemontese M, Gentilucci L, et al. The effects of maternal caffeine and  
10  
11 chocolate intake on fetal heart rate. *J Matern Fetal Neonatal Med* 2012;25(5):528-30.  
12  
13 27. Choi JH, Chang HW, Rhee SJ. Effect of green tea catechin on arachidonic acid cascade in  
14  
15 chronic cadmium-poisoned rats. *Asia Pac J Clin Nutr* 2002;11(4):292-7.  
16  
17 28. Zijp IM, Korver O, Tijburg LBM. Effect of tea and other dietary factors on iron absorption.  
18  
19 Critical Reviews in Food Science and Nutrition. *Crit Rev Food Sci Nutr* 2000;40(5):371-98.  
20  
21 29. Delimont NM, Haub MD, & Lindshield BL. The Impact of Tannin Consumption on Iron  
22  
23 Bioavailability and Status: A Narrative Review1. *CDN* 2017;1(2):1-12.  
24  
25 30. Fan FS. Iron deficiency anemia due to excessive green tea drinking. *Clin Case Rep*  
26  
27 2016;4(11):1053-6.  
28  
29 31. Wu MH, Lu CW, Chuang PC, et al. Prostaglandin E-2: the master of endometriosis? *Exp Biol*  
30  
31 *Med* 2010;235(6):668-77.  
32  
33 32. Rakhila H, Bourcier N, Akoum A, et al. Abnormal Expression of Prostaglandins E2 and F2  
34  
35 alpha Receptors and Transporters in Patients with Endometriosis. *Biomed Res Int* 2015.  
36  
37 33. Xu H, Lui WT, Chu CY, et al. Anti-angiogenic effects of green tea catechin on an  
38  
39 experimental endometriosis mouse model. *Hum reprod* 2009;24(3):608-18.  
40  
41 34. Nunnink S, Meana M, Gynecology. Remembering the pain: accuracy of pain recall in  
42  
43 endometriosis. *J Psychosom Obstet Gynaecol* 2007;28(4):201-8.  
44  
45  
46  
47  
48  
49  
50  
51  
52  
53  
54  
55  
56  
57  
58  
59  
60

**STROBE 2007 (v4) checklist of items to be included in reports of observational studies in epidemiology\***  
**Checklist for cohort, case-control, and cross-sectional studies (combined)**

| Section/Topic             | Item # | Recommendation                                                                                                                                                                                                                                                                                                                                                                                                                                                         | Reported on page # |
|---------------------------|--------|------------------------------------------------------------------------------------------------------------------------------------------------------------------------------------------------------------------------------------------------------------------------------------------------------------------------------------------------------------------------------------------------------------------------------------------------------------------------|--------------------|
| Title and abstract        | 1      | (a) Indicate the study’s design with a commonly used term in the title or the abstract                                                                                                                                                                                                                                                                                                                                                                                 | 2                  |
|                           |        | (b) Provide in the abstract an informative and balanced summary of what was done and what was found                                                                                                                                                                                                                                                                                                                                                                    | 2                  |
| <b>Introduction</b>       |        |                                                                                                                                                                                                                                                                                                                                                                                                                                                                        |                    |
| Background/rationale      | 2      | Explain the scientific background and rationale for the investigation being reported                                                                                                                                                                                                                                                                                                                                                                                   | 4                  |
| Objectives                | 3      | State specific objectives, including any pre-specified hypotheses                                                                                                                                                                                                                                                                                                                                                                                                      | 5                  |
| <b>Methods</b>            |        |                                                                                                                                                                                                                                                                                                                                                                                                                                                                        |                    |
| Study design              | 4      | Present key elements of study design early in the paper                                                                                                                                                                                                                                                                                                                                                                                                                | 5                  |
| Setting                   | 5      | Describe the setting, locations, and relevant dates, including periods of recruitment, exposure, follow-up, and data collection                                                                                                                                                                                                                                                                                                                                        | 5                  |
| Participants              | 6      | (a) <i>Cohort study</i> —Give the eligibility criteria, and the sources and methods of selection of participants. Describe methods of follow-up<br><i>Case-control study</i> —Give the eligibility criteria, and the sources and methods of case ascertainment and control selection. Give the rationale for the choice of cases and controls<br><i>Cross-sectional study</i> —Give the eligibility criteria, and the sources and methods of selection of participants | 5                  |
|                           |        | (b) <i>Cohort study</i> —For matched studies, give matching criteria and number of exposed and unexposed<br><i>Case-control study</i> —For matched studies, give matching criteria and the number of controls per case                                                                                                                                                                                                                                                 |                    |
| Variables                 | 7      | Clearly define all outcomes, exposures, predictors, potential confounders, and effect modifiers. Give diagnostic criteria, if applicable                                                                                                                                                                                                                                                                                                                               | 6-7                |
| Data sources/ measurement | 8*     | For each variable of interest, give sources of data and details of methods of assessment (measurement). Describe comparability of assessment methods if there is more than one group                                                                                                                                                                                                                                                                                   | 6                  |
| Bias                      | 9      | Describe any efforts to address potential sources of bias                                                                                                                                                                                                                                                                                                                                                                                                              | 7                  |
| Study size                | 10     | Explain how the study size was arrived at                                                                                                                                                                                                                                                                                                                                                                                                                              | 7                  |
| Quantitative variables    | 11     | Explain how quantitative variables were handled in the analyses. If applicable, describe which groupings were chosen and why                                                                                                                                                                                                                                                                                                                                           | 6                  |
| Statistical methods       | 12     | (a) Describe all statistical methods, including those used to control for confounding                                                                                                                                                                                                                                                                                                                                                                                  | 7                  |
|                           |        | (b) Describe any methods used to examine subgroups and interactions                                                                                                                                                                                                                                                                                                                                                                                                    | 6                  |
|                           |        | (c) Explain how missing data were addressed                                                                                                                                                                                                                                                                                                                                                                                                                            |                    |
|                           |        | (d) <i>Cohort study</i> —If applicable, explain how loss to follow-up was addressed<br><i>Case-control study</i> —If applicable, explain how matching of cases and controls was addressed                                                                                                                                                                                                                                                                              |                    |

|                          |     |                                                                                                                                                                                                                                                                                                                                                                                                               |              |
|--------------------------|-----|---------------------------------------------------------------------------------------------------------------------------------------------------------------------------------------------------------------------------------------------------------------------------------------------------------------------------------------------------------------------------------------------------------------|--------------|
|                          |     | <i>Cross-sectional study</i> —If applicable, describe analytical methods taking account of sampling strategy                                                                                                                                                                                                                                                                                                  |              |
|                          |     | (e) Describe any sensitivity analyses                                                                                                                                                                                                                                                                                                                                                                         |              |
| <b>Results</b>           |     |                                                                                                                                                                                                                                                                                                                                                                                                               |              |
| Participants             | 13* | (a) Report numbers of individuals at each stage of study—eg numbers potentially eligible, examined for eligibility, confirmed eligible, included in the study, completing follow-up, and analysed<br>(b) Give reasons for non-participation at each stage<br>(c) Consider use of a flow diagram                                                                                                               | 7            |
| Descriptive data         | 14* | (a) Give characteristics of study participants (eg demographic, clinical, social) and information on exposures and potential confounders<br>(b) Indicate number of participants with missing data for each variable of interest<br>(c) <i>Cohort study</i> —Summarise follow-up time (eg, average and total amount)                                                                                           | 7-10<br>7-10 |
| Outcome data             | 15* | <i>Cohort study</i> —Report numbers of outcome events or summary measures over time<br><i>Case-control study</i> —Report numbers in each exposure category, or summary measures of exposure<br><i>Cross-sectional study</i> —Report numbers of outcome events or summary measures                                                                                                                             | 7            |
| Main results             | 16  | (a) Give unadjusted estimates and, if applicable, confounder-adjusted estimates and their precision (eg, 95% confidence interval). Make clear which confounders were adjusted for and why they were included<br>(b) Report category boundaries when continuous variables were categorized<br>(c) If relevant, consider translating estimates of relative risk into absolute risk for a meaningful time period | 11-12        |
| Other analyses           | 17  | Report other analyses done—eg analyses of subgroups and interactions, and sensitivity analyses                                                                                                                                                                                                                                                                                                                |              |
| <b>Discussion</b>        |     |                                                                                                                                                                                                                                                                                                                                                                                                               |              |
| Key results              | 18  | Summarise key results with reference to study objectives                                                                                                                                                                                                                                                                                                                                                      | 12-13        |
| Limitations              | 19  | Discuss limitations of the study, taking into account sources of potential bias or imprecision. Discuss both direction and magnitude of any potential bias                                                                                                                                                                                                                                                    | 15-16        |
| Interpretation           | 20  | Give a cautious overall interpretation of results considering objectives, limitations, multiplicity of analyses, results from similar studies, and other relevant evidence                                                                                                                                                                                                                                    | 13-15        |
| Generalisability         | 21  | Discuss the generalisability (external validity) of the study results                                                                                                                                                                                                                                                                                                                                         |              |
| <b>Other information</b> |     |                                                                                                                                                                                                                                                                                                                                                                                                               |              |
| Funding                  | 22  | Give the source of funding and the role of the funders for the present study and, if applicable, for the original study on which the present article is based                                                                                                                                                                                                                                                 | 16           |

\*Give information separately for cases and controls in case-control studies and, if applicable, for exposed and unexposed groups in cohort and cross-sectional studies.

**Note:** An Explanation and Elaboration article discusses each checklist item and gives methodological background and published examples of transparent reporting. The STROBE checklist is best used in conjunction with this article (freely available on the Web sites of PLoS Medicine at <http://www.plosmedicine.org/>, Annals of Internal Medicine at <http://www.annals.org/>, and Epidemiology at <http://www.epidem.com/>). Information on the STROBE Initiative is available at [www.strobe-statement.org](http://www.strobe-statement.org).

# BMJ Open

## Association of tea drinking and dysmenorrhea among reproductive-age women in Shanghai, China (2013-2015): a cross-sectional study

|                                 |                                                                                                                                                                                                                                                                                                                                                                                                                                                                                                                                                                                                                                                                                                                                                                                                                                                                                                                                                                                                             |
|---------------------------------|-------------------------------------------------------------------------------------------------------------------------------------------------------------------------------------------------------------------------------------------------------------------------------------------------------------------------------------------------------------------------------------------------------------------------------------------------------------------------------------------------------------------------------------------------------------------------------------------------------------------------------------------------------------------------------------------------------------------------------------------------------------------------------------------------------------------------------------------------------------------------------------------------------------------------------------------------------------------------------------------------------------|
| Journal:                        | <i>BMJ Open</i>                                                                                                                                                                                                                                                                                                                                                                                                                                                                                                                                                                                                                                                                                                                                                                                                                                                                                                                                                                                             |
| Manuscript ID                   | bmjopen-2018-026643.R2                                                                                                                                                                                                                                                                                                                                                                                                                                                                                                                                                                                                                                                                                                                                                                                                                                                                                                                                                                                      |
| Article Type:                   | Research                                                                                                                                                                                                                                                                                                                                                                                                                                                                                                                                                                                                                                                                                                                                                                                                                                                                                                                                                                                                    |
| Date Submitted by the Author:   | 18-Feb-2019                                                                                                                                                                                                                                                                                                                                                                                                                                                                                                                                                                                                                                                                                                                                                                                                                                                                                                                                                                                                 |
| Complete List of Authors:       | Zhang, Xiaoyu; Ministry of Education-Shanghai Key Laboratory of Children's Environmental Health, Xinhua Hospital, Shanghai Jiao Tong University School of Medicine<br>Zhang, Rongrong; Department of Obstetrics and Gynecology, Xinhua Hospital, Shanghai Jiao Tong University School of Medicine<br>Chen, Dan; Ministry of Education-Shanghai Key Laboratory of Children's Environmental Health, Xinhua Hospital, Shanghai Jiao Tong University School of Medicine<br>Huang, Rong; Ministry of Education-Shanghai Key Laboratory of Children's Environmental Health, Xinhua Hospital, Shanghai Jiao Tong University School of Medicine<br>Tian, Ying; School of Public Health, Shanghai Jiao Tong University<br>Zhang, Ping; Department of Obstetrics and Gynecology, Xinhua Hospital, Shanghai Jiao Tong University School of Medicine<br>Zhang, Jun; Ministry of Education-Shanghai Key Laboratory of Children's Environmental Health, Xinhua Hospital, Shanghai Jiao Tong University School of Medicine |
| <b>Primary Subject Heading</b>: | Obstetrics and gynaecology                                                                                                                                                                                                                                                                                                                                                                                                                                                                                                                                                                                                                                                                                                                                                                                                                                                                                                                                                                                  |
| Secondary Subject Heading:      | Public health                                                                                                                                                                                                                                                                                                                                                                                                                                                                                                                                                                                                                                                                                                                                                                                                                                                                                                                                                                                               |
| Keywords:                       | tea, dysmenorrhea, reproductive age                                                                                                                                                                                                                                                                                                                                                                                                                                                                                                                                                                                                                                                                                                                                                                                                                                                                                                                                                                         |
|                                 |                                                                                                                                                                                                                                                                                                                                                                                                                                                                                                                                                                                                                                                                                                                                                                                                                                                                                                                                                                                                             |

SCHOLARONE™  
Manuscripts



1  
2  
3 **Association of tea drinking and dysmenorrhea among reproductive-age**  
4  
5 **women in Shanghai, China (2013-2015): a cross-sectional study**  
6

7 Xiaoyu Zhang<sup>a</sup>, Rongrong Zhang<sup>b</sup>, Dan Chen<sup>a</sup>, Rong Huang<sup>a</sup>, Ying Tian<sup>c</sup>, Ping Zhang<sup>\*b</sup>, Jun Zhang<sup>\*a</sup> for the  
8  
9 Shanghai Birth Cohort  
10

11 <sup>a</sup> Ministry of Education-Shanghai Key Laboratory of Children's Environmental Health, Xinhua Hospital,  
12  
13 Shanghai Jiao Tong University School of Medicine, Shanghai, 200092, China  
14

15 <sup>b</sup> Department of Obstetrics and Gynecology, Xinhua Hospital, Shanghai Jiao Tong University School of  
16  
17 Medicine, Shanghai, 200092, China  
18

19 <sup>c</sup> School of Public Health, Shanghai Jiao Tong University, Shanghai, 200025, China  
20

21 **Corresponding authors**  
22

23 Address correspondence to J Zhang, Xinhua Hospital, Shanghai Jiao Tong University School of Medicine,  
24  
25 Shanghai, 200092, China. Telephone: (Work) +86-21-2507 8871, (Fax) +86-21-2507 8875. E-mail:  
26  
27 junjimzhang@sina.com; or P Zhang, Department of Obstetrics and Gynecology, Xinhua Hospital,  
28  
29 Shanghai Jiao Tong University School of Medicine, Shanghai, 200092, China. Telephone: (Work)  
30  
31 +8613651788220, (Fax) +8625078200. E-mail: zjqzp@126.com.  
32  
33  
34  
35  
36  
37  
38  
39  
40  
41  
42  
43  
44  
45  
46  
47  
48  
49  
50  
51  
52  
53  
54  
55  
56  
57  
58  
59  
60

## ABSTRACT

**Objectives:** To investigate the association between tea drinking and dysmenorrhea among women of reproductive age.

**Design:** A cross-sectional study based on Shanghai Birth Cohort Study.

**Setting:** Two preconceptional care clinics in Shanghai, China.

**Participants:** 1183 women of reproductive age who sought preconceptional care were recruited from Aug 2013 to April 2015.

**Primary and secondary outcome measures:** Participants were asked if they had pelvic pain associated with menstrual bleeding during the past 12 months and to further grade the intensity of menstrual cramp as mild, moderate and severe. Multinomial logistic regression was performed to assess the association of tea drinking and dysmenorrhea. Other information such as demographic and lifestyle factors were also collected and assessed in relation to dysmenorrhea.

**Results:** The prevalence of dysmenorrhea was 57.8%, among whom 10.4% and 3.5% had moderate and severe dysmenorrhea, respectively. Tea drinking was associated with a lower prevalence of dysmenorrhea [adjusted odds ratio (aOR)=0.68, 95%CI: 0.50-0.93 for mild dysmenorrhea; aOR=0.59 (0.32-1.04) for moderate-to-severe dysmenorrhea]. Green tea and oolong tea appeared to have most reduction in the prevalence of dysmenorrhea [For mild dysmenorrhea: green tea: aOR=0.63 (0.44-0.90) and oolong tea: aOR=0.60 (0.35-1.03); for moderate-to-severe dysmenorrhea: green tea: aOR=0.42 (0.20-0.85) and oolong tea: aOR=0.34 (0.11-1.09)].

**Conclusions:** Consumptions of green tea and possibly oolong tea were associated with a lower prevalence of dysmenorrhea.

**Keywords:** tea; dysmenorrhea; reproductive age

**Word accounts:** 3151

**Strengths and limitations of this study**

- This was a large, population-based study, involving extensive potential confounders in the analyses.
- This was a cross-sectional study, and therefore cannot establish a causal relationship.
- The information on dysmenorrhoea was based on participants' self-report.

For peer review only

## INTRODUCTION

Dysmenorrhea refers to pelvic pain during menstruation and can be classified as primary and secondary. Primary dysmenorrhea begins at or shortly after menarche without any evidence of pathology. Pain usually occurs just before or during menstrual period, lasting for 2-3 days.[1] Secondary dysmenorrhea is caused by specific pathological conditions, such as adenomyosis and fibroids, endometriosis, and pelvic inflammatory disease. The onset of secondary dysmenorrhea begins later than the primary dysmenorrhea, usually more than 2 years after menarche.[2] Due to the lack of a standard method grading dysmenorrhea-related pain, the estimated prevalence of dysmenorrhea varied widely, ranging from 16.8% to 81%.[3, 4] A study from China reported that 56.4% of female university students had dysmenorrhea, and among them, 6.5% had very severe (unbearable) symptoms.[5] Dysmenorrhea limits women's daily activity and is associated with absenteeism from school or work.[6] Furthermore, women with primary or secondary dysmenorrhea have higher total health care costs than those without syndromes.[7]

Overproduction of uterine prostaglandins from arachidonic acid through cyclo-oxygenase (COX) pathway has been commonly accepted as the etiology of primary dysmenorrhea.[8] The intensity of painful cramps and dysmenorrhea-related symptoms are proportional to the level of prostaglandin released.[1] Non-steroidal anti-inflammatory drugs (NSAIDs) are commonly prescribed as the first line of treatment for dysmenorrhea, due to its suppression of COX activity. However, the inhibitory effect of NSAIDs on COX-1 brings about several physiological concerns.[2, 9] 10%-20% of women with primary dysmenorrhea fail to respond to or are intolerable to NSAIDs.[2] More and more women with dysmenorrhea resort to complementary and alternative medicine.

Tea has been considered as a medicinal staple for hundreds of years in China, thanks to the potential health benefits of tea flavonoids as antioxidants, anti-carcinogenic and anti-arteriosclerotic agent. Recently, green tea catechins have been demonstrated their inhibitory

1  
2  
3 effect on COX-2 activity.[10, 11] Hence, it is hypothesized that green tea may possibly decrease  
4 prostaglandin level and thereby relieve the severity of dysmenorrhea. However, there is a huge  
5 paucity of epidemiological evidence of the association of tea drinking with dysmenorrhea,  
6 especially green tea consumption, and the results of association are still inconsistent. A  
7 cross-sectional study of 729 Turkish women of reproductive age showed no association between  
8 tea drinking and dysmenorrhea,[12] while another small study with 440 female university  
9 students suggested that students consuming >4 glasses of tea per day had a higher risk of  
10 primary dysmenorrhea than those who did not drink tea.[13] To fill in the knowledge gap, the  
11 present study aims to examine the relationship between tea drinking and dysmenorrhea in  
12 Chinese women of reproductive age.

## 23 **MATERIALS AND METHODS**

24  
25  
26 This study is based on the Shanghai Birth Cohort Study (SBC), which is a hospital-based,  
27 multi-center cohort study. It aims to assess the impacts of genetic, environmental and behavioral  
28 factors on reproductive health, pregnancy outcomes, child growth, development and risks of  
29 diseases. The reader is referred to cohort profile for more details about SBC.[14]

### 34 **Patient and participant involvement**

35  
36  
37 In SBC, couples of reproductive age were recruited at either preconception or first trimester  
38 of pregnancy. Potential participants who agreed to participate in the study would sign an informed  
39 consent during recruitment. Women were followed at several time points, including preconception  
40 (if they were recruited before pregnancy), 1<sup>st</sup>, 2<sup>nd</sup>, 3<sup>rd</sup> trimesters and birth, and husbands were  
41 interviewed at preconception or at birth. Information on demographic characteristics, health  
42 behaviors, social support, reproductive and medical history, and family history of diseases was  
43 collected. Biological specimens were collected at each round of follow-up for further analyses.

44  
45  
46 This study used data from the preconception women who sought preconceptional care at 2  
47 preconceptional care clinics in Shanghai, China, with the following inclusion criteria: 1) married  
48 women with age  $\geq$  20yrs (legal marriage age in China); 2) plan to be pregnant in the following

1  
2  
3 year; 3) registered residents of Shanghai who do not plan to move out in the next 2 years; 4) plan  
4  
5 to give birth in collaborating hospitals. Women who had tried to conceive for 12 months or longer  
6  
7 were excluded from this study.

### 9 **Socio-demographic characteristics**

11 Participants provided information on demographic characteristics and lifestyle factors.  
12  
13 Demographic characteristics include age, ethnicity, education level, income by herself,  
14  
15 household income, as well as height and weight. Body mass index (BMI) was calculated as  
16  
17 weight in kilograms divided by height in meters squared. Lifestyle factors included smoking  
18  
19 history, alcohol intake, consumption of fruits and vegetables, use of dietary supplements and  
20  
21 physical activity which was assessed by International Physical Activity Questionnaire short  
22  
23 version.[15]  
24

26 In addition, the consumptions of caffeinated beverages, such as coffee, soda (Coca-Cola,  
27  
28 Pepsi), and energy drink (e.g., Red Bull), were queried. Specifically, the consumption of tea was  
29  
30 assessed by a structured questionnaire. Participants were asked whether they drank tea in their  
31  
32 daily life. If yes, what type of tea they usually drank, including green, oolong and black tea, which  
33  
34 are commonly consumed in China. They could choose one or multiple categories depending on  
35  
36 their tea drinking habits. Participants were also asked about the number of years of tea drinking  
37  
38 and the choices were “<1 year”, “1-5 years”, “6-10 years” and “>10 years”, and the number of  
39  
40 cups per day.  
41

### 43 **Menstrual characteristics**

45 Women were asked about menstrual characteristics including the onset of menarche,  
46  
47 menstrual cycle length, bleeding duration, volume of menstrual flow and dysmenorrhea. If  
48  
49 participants stated that they had pelvic pain associated with menstrual bleeding during the past  
50  
51 12 months, they were further asked to grade the intensity of menstrual cramp as mild, moderate  
52  
53 and severe. Mild pain was defined as one could feel the pain but did not need further treatment.  
54  
55 Moderate pain was defined as one needed to use therapy or treatment to relieve dysmenorrhea,  
56

1  
2  
3 and severe pain was referred as taking absence of work or bed rest besides treatment. The  
4 method grading pain intensity in this study was modified based on verbal rating scale - a  
5 validated pain scale to evaluate dysmenorrhea.[16] Although verbal rating scale is not as  
6 sensitive as the visual scale or numerical rating scale, which offer a broader spectrum of  
7 differentiating pain intensity, it is easier for participants to fill out and thereby limits missing data.  
8  
9 The regularity of menstrual cycle length was assessed with the question: "Is your menstrual cycle  
10 length regular?". Length variation of 8 days or more was considered as irregular. If irregular, the  
11 durations of the shortest and longest menstrual cycles were asked. If regular, participants stated  
12 the average length of their menstrual cycle. Participants were asked to state their volume of  
13 menstrual flow with four choices: "light", "normal" and "heavy".  
14  
15  
16  
17  
18  
19  
20  
21  
22  
23

### 24 **Statistical analysis**

25  
26 All the analyses were performed using R studio (Version 1.0.136). We described the  
27 distribution of continuous variables (including mean and standard error) according to the severity  
28 of dysmenorrhea, and described the relationship of categorical variables with severity of  
29 dysmenorrhea using contingency tables. In addition, the differences in demographic  
30 characteristics and lifestyle factors according to the severity of dysmenorrhea were analyzed by  
31 Kruskal-Wallis test for categorical variables and one-way ANOVA for continuous variables. The  
32 primary result was the relationship between tea drinking and dysmenorrhea, which was  
33 performed by multinomial logistic regression model. Variables with  $P < 0.05$  of the significance test  
34 for the difference were selected in the final logistic model. Other confounders were selected if  
35 they could change the coefficient by more than 10% compared with unadjusted coefficient.  
36  
37  
38  
39  
40  
41  
42  
43  
44  
45  
46  
47  $P < 0.05$  (two sides) was considered statistically significant.  
48

### 49 **Patient and public involvement statement**

50  
51 Patients or the public were not involved in the design or conduct of the study. Participants will  
52 be able to view the study results once the study is published.  
53  
54

### 55 **RESULTS**

A total of 1183 participants were recruited, of whom 23 did not finish the interview and 8 participants did not provide information on severity of dysmenorrhea, leaving 1152 women for the final analysis. The prevalence of dysmenorrhea was 57.8% (666/1152). Among them, 86.2% (574) had mild, 10.4% (69) moderate, and 3.5% (23) severe dysmenorrhea. Since the total number of moderate and severe dysmenorrhea was only 99, we combined them together for further analyses.

**Table 1. Demographic and menstrual characteristics according to the severity of dysmenorrhea**

| Variables                               | Dysmenorrhea (N (%) or (Mean $\pm$ SD)) |                |                         | P-value |
|-----------------------------------------|-----------------------------------------|----------------|-------------------------|---------|
|                                         | No (486)                                | Mild (574)     | Moderate-to-severe (92) |         |
| <b>Age (years)</b>                      | 29.9 $\pm$ 3.5                          | 29.2 $\pm$ 3.0 | 28.4 $\pm$ 2.4          | <0.001  |
| <b>BMI (kg/m<sup>2</sup>)</b>           | 21.2 $\pm$ 2.9                          | 20.9 $\pm$ 2.5 | 20.3 $\pm$ 3.0          | 0.021   |
| <b>Race</b>                             |                                         |                |                         | 0.733   |
| Han                                     | 474 (42.2)                              | 559 (49.8)     | 89 (7.9)                |         |
| Others                                  | 12 (40.0)                               | 15 (50.0)      | 3 (10.0)                |         |
| <b>Education</b>                        |                                         |                |                         | 0.533   |
| Junior college                          | 96 (42.7)                               | 113 (50.2)     | 16 (7.1)                |         |
| Undergraduate                           | 302 (43.0)                              | 346 (49.2)     | 55 (7.8)                |         |
| Graduate                                | 88 (39.3)                               | 115 (51.3)     | 21 (9.4)                |         |
| <b>Home income</b>                      |                                         |                |                         | 0.646   |
| < ¥100K                                 | 31 (36.9)                               | 48 (57.1)      | 5 (6.0)                 |         |
| ¥100-150K                               | 77 (41.4)                               | 96 (51.6)      | 13 (7.0)                |         |
| ≥ ¥150K                                 | 357 (43.9)                              | 392 (48.2)     | 65 (8.0)                |         |
| <b>Personal income</b>                  |                                         |                |                         | 0.622   |
| < ¥100K                                 | 241 (40.3)                              | 315 (52.7)     | 42 (7.0)                |         |
| ¥100-150K                               | 159 (45.2)                              | 161 (45.7)     | 32 (9.1)                |         |
| ≥ ¥150K                                 | 62 (43.7)                               | 68 (47.9)      | 12 (8.5)                |         |
| <b>Onset of menarche (years)</b>        | 13.4 $\pm$ 1.4                          | 13.4 $\pm$ 1.3 | 13.4 $\pm$ 1.3          | 0.763   |
| <b>Length of menstrual cycle (days)</b> | 29.8 $\pm$ 2.9                          | 29.7 $\pm$ 2.9 | 30.3 $\pm$ 7.7          | 0.308   |
| <b>Bleeding duration (days/month)</b>   | 5.6 $\pm$ 1.4                           | 5.7 $\pm$ 1.2  | 5.7 $\pm$ 1.3           | 0.268   |
| <b>Volume of menstrual flow</b>         |                                         |                |                         | <0.001  |
| Light                                   | 48(48.0)                                | 44(44.0)       | 8(8.0)                  |         |
| Normal                                  | 419(43.2)                               | 487(50.2)      | 65(6.7)                 |         |
| Heavy                                   | 18(23.1)                                | 41(52.6)       | 19(24.4)                |         |
| <b>Regularity of menstrual cycle</b>    |                                         |                |                         | 0.773   |
| Regular                                 | 393 (41.7)                              | 479 (50.8)     | 71 (7.5)                |         |
| Irregular                               | 93 (44.5)                               | 95 (45.5)      | 21 (10.0)               |         |
| <b>Having had a pregnancy</b>           |                                         |                |                         | <0.001  |
| No                                      | 244 (37.2)                              | 344 (52.4)     | 68 (10.4)               |         |
| Yes                                     | 241 (48.7)                              | 230 (46.5)     | 24 (4.8)                |         |

P-value was obtained by Kruskal-Wallis test for categorical variables and one-way ANOVA for continuous variables



1  
2  
3 Table 1 presents the demographic and menstrual characteristics of the study population  
4 according to the severity of dysmenorrhea. The average age of all the 1152 participants was 29.4  
5  $\pm$  3.2 years, ranging from 21 to 44 years. 5% of women were 35 years or older. Women with  
6 moderate to severe dysmenorrhea had a mean age of 28.4  $\pm$  2.4 years, in comparison to 29.9  
7  $\pm$  3.5 years in women without dysmenorrhea. The average BMI was 21.0  $\pm$  2.7 kg/m<sup>2</sup>, with 7.2%  
8 being overweight or obese (BMI  $\geq$  25 kg/m<sup>2</sup>). Non-dysmenorrhea group had a higher BMI than  
9 mild-dysmenorrhea group, followed by moderate-to-severe group. There was no difference in  
10 education, women's income and household income among the three groups.  
11  
12  
13  
14  
15  
16  
17  
18

19  
20 The average age of the onset of menarche was 13.4  $\pm$  1.3 years. The average length of  
21 menstrual cycle and bleeding was 29.8  $\pm$  3.5 days and 5.7  $\pm$  1.3 days, respectively, among all the  
22 women of reproductive age. The prevalence of moderate-to-severe dysmenorrhea was higher in  
23 women with heavy menstrual flow, compared with women with light and normal menses.  
24 Multiparous women were less likely to have dysmenorrhea.  
25  
26  
27  
28  
29

30 Table 2 presents the distribution of lifestyle factors according to the intensity of  
31 dysmenorrhea. Very few women smoked. There was no association between smoking and  
32 dysmenorrhea. However, women who were exposed to second-hand smoke from her husband,  
33 roommates or colleagues were more likely to have dysmenorrhea.  
34  
35  
36  
37  
38

39 Consumptions of vegetables, fruits, dietary supplements of Vitamin E and fish oil were not  
40 associated with the severity of menstrual pain (Table 2). However, the prevalence of  
41 moderate-to-severe dysmenorrhea was slightly higher in women who did not take Vitamin E,  
42 compared with Vitamin E consumers (8.8% versus 4.0%). Physical activity (vigorous, moderate  
43 or walking) was not associated with the severity of dysmenorrhea.  
44  
45  
46  
47  
48

49 The prevalence of tea drinking was 34.5% (398 of 1152) among women with reproductive  
50 age, and the number of tea drinkers according to the severity of dysmenorrhea was shown in  
51 Table 3. Table 4 shows the association between tea drinking and dysmenorrhea. After adjusting  
52 for age, BMI, personal income, ever pregnant, consumption of caffeinated beverages (coffee,  
53  
54  
55  
56  
57  
58  
59  
60

**Table 2. Lifestyle factors according to the severity of dysmenorrhea**

| Variables                                   | Dysmenorrhea (N (%)) |            |                         | P-value |
|---------------------------------------------|----------------------|------------|-------------------------|---------|
|                                             | No (486)             | Mild (574) | Moderate-to-severe (92) |         |
| <b>Smoking now</b>                          |                      |            |                         | 0.193   |
| No                                          | 481 (42.3)           | 569 (50.0) | 88 (7.7)                |         |
| Yes                                         | 5 (35.7)             | 5 (35.7)   | 4 (28.6)                |         |
| <b>Used to smoke</b>                        |                      |            |                         | 0.604   |
| No                                          | 471 (42.2)           | 557 (50.0) | 87 (7.8)                |         |
| Yes                                         | 9 (47.4)             | 9 (47.4)   | 1 (5.3)                 |         |
| <b>Second-hand smoke</b>                    |                      |            |                         | <0.001  |
| No                                          | 365 (46.5)           | 363 (46.2) | 57 (7.3)                |         |
| Yes                                         | 121 (33.2)           | 209 (57.3) | 35 (9.6)                |         |
| <b>Alcohol drinking within one year</b>     |                      |            |                         | 0.110   |
| No                                          | 325 (43.6)           | 366 (49.1) | 54 (7.2)                |         |
| Yes                                         | 160 (39.4)           | 208 (51.2) | 38 (9.4)                |         |
| <b>Current alcohol drinking</b>             |                      |            |                         | 0.676   |
| No                                          | 469 (42.3)           | 551 (49.7) | 88 (7.9)                |         |
| Yes                                         | 17 (39.5)            | 22 (51.2)  | 4 (9.3)                 |         |
| <b>Vitamin E</b>                            |                      |            |                         | 0.065   |
| No                                          | 392 (41.3)           | 474 (49.9) | 84 (8.8)                |         |
| Yes                                         | 81 (46.8)            | 85 (49.1)  | 7 (4.0)                 |         |
| <b>Supplementation of fish oil</b>          |                      |            |                         | 0.874   |
| No                                          | 438 (42.0)           | 519 (49.8) | 85 (8.2)                |         |
| Yes                                         | 33 (42.9)            | 38 (49.4)  | 6 (7.8)                 |         |
| <b>Leaf vegetables</b>                      |                      |            |                         | 0.359   |
| < 1 per week                                | 8 (57.1)             | 6 (42.9)   | 0 (0)                   |         |
| 1-3 per week                                | 73 (42.4)            | 81 (47.1)  | 18 (10.5)               |         |
| 4-7 per week                                | 264 (40.7)           | 330 (50.9) | 54 (8.3)                |         |
| ≥ 2 per day                                 | 137 (44.1)           | 154 (49.5) | 20 (6.4)                |         |
| <b>Fruits</b>                               |                      |            |                         | 0.262   |
| < 1 per week                                | 8 (32.0)             | 15 (60.0)  | 2 (8.0)                 |         |
| 1-3 per week                                | 90 (39.1)            | 113 (49.1) | 27 (11.7)               |         |
| 4-7 per week                                | 286 (43.4)           | 331 (50.2) | 42 (6.4)                |         |
| ≥ 2 per day                                 | 99 (43.2)            | 109 (47.6) | 21 (9.2)                |         |
| <b>Vigorous physical activity</b>           |                      |            |                         | 0.460   |
| No                                          | 393 (41.6)           | 475 (50.3) | 77(8.1)                 |         |
| Yes                                         | 85 (44.7)            | 90 (47.4)  | 15(7.9)                 |         |
| <b>Moderate physical activity</b>           |                      |            |                         | 0.456   |
| No                                          | 300 (41.3)           | 366 (50.3) | 61 (8.4)                |         |
| Yes                                         | 171 (43.4)           | 193 (49.0) | 30 (7.6)                |         |
| <b>Walk</b>                                 |                      |            |                         | 0.195   |
| No                                          | 24 (57.1)            | 12 (28.6)  | 6 (14.3)                |         |
| Yes                                         | 409 (41.6)           | 495 (50.4) | 78 (7.9)                |         |
| P-value was obtained by Kruskal-Wallis test |                      |            |                         |         |

Soda or energy drink), alcohol drinking during last 12 months, second-hand smoke, supplementation of fish oil, consumption of leaf vegetable, moderate physical activity and walking, tea drinking was associated with a 32% lower prevalence of mild dysmenorrhea. The aOR of mild dysmenorrhea was attenuated by half in women who drank tea for 3-5 cups per day compared with women who did not drink tea, whereas we did not find such relationship in higher tea consumers ( $\geq 6$  cups/day). We did not find a relationship between number of years of tea drinking and severity of dysmenorrhea among tea drinkers. Consumption of green tea was associated with a lower prevalence of dysmenorrhea, and the relationship was stronger in moderate-to-severe dysmenorrhea than in mild dysmenorrhea, which is shown in Table 5. Consumption of oolong tea was associated with a lower prevalence of dysmenorrhea but the association did not reach statistical significance.

**Table 3. Caffeinated beverages according to the severity of dysmenorrhea**

| Variables                      | Dysmenorrhea |            |                         | P-value |
|--------------------------------|--------------|------------|-------------------------|---------|
|                                | No (486)     | Mild (574) | Moderate-to-severe (92) |         |
| <b>Tea</b>                     |              |            |                         | 0.216   |
| No                             | 308 (40.8)   | 384 (50.9) | 62 (8.2)                |         |
| Yes                            | 178 (44.7)   | 190 (47.7) | 30 (7.5)                |         |
| <b>Green tea</b>               |              |            |                         | 0.012   |
| No                             | 347 (40.2)   | 443 (51.3) | 74 (8.6)                |         |
| Yes                            | 139 (48.3)   | 131 (45.5) | 18 (6.3)                |         |
| <b>Black tea</b>               |              |            |                         | 0.337   |
| No                             | 413 (42.7)   | 481 (49.7) | 74 (7.6)                |         |
| Yes                            | 73 (39.7)    | 93 (50.5)  | 18 (9.8)                |         |
| <b>Oolong tea</b>              |              |            |                         | 0.033   |
| No                             | 434 (41.3)   | 528 (50.3) | 88 (8.4)                |         |
| Yes                            | 52 (51.0)    | 46 (45.1)  | 4 (3.9)                 |         |
| <b>Coffee</b>                  |              |            |                         | 0.027   |
| No                             | 275 (43.9)   | 317 (50.6) | 34 (5.4)                |         |
| Yes                            | 211 (40.1)   | 257 (48.9) | 58 (11.0)               |         |
| <b>Soda (Coca-Cola, Pepsi)</b> |              |            |                         | 0.047   |
| No                             | 335 (43.7)   | 381 (49.7) | 51 (6.6)                |         |
| Yes                            | 151 (39.2)   | 193 (50.1) | 41 (10.6)               |         |
| <b>Energy beverages</b>        |              |            |                         | 0.050   |
| No                             | 462 (42.7)   | 539 (49.8) | 81 (7.5)                |         |
| Yes                            | 24 (34.3)    | 35 (50.0)  | 11 (15.7)               |         |

P-value was obtained by Kruskal-Wallis test

**Table 4. Relationship of tea drinking and dysmenorrhea**

| Variable                               | Crude model (cOR) |                 |                         | Adjusted model (aOR) <sup>a</sup> |                         |
|----------------------------------------|-------------------|-----------------|-------------------------|-----------------------------------|-------------------------|
|                                        | No (486)          | Mild (574)      | Moderate-to-severe (92) | Mild (574)                        | Moderate-to-severe (92) |
| <b>Tea</b>                             |                   |                 |                         |                                   |                         |
| No                                     | 1                 | 1               | 1                       | 1                                 | 1                       |
| Yes                                    | 1                 | 0.86(0.66-1.10) | 0.84(0.52-1.34)         | 0.68(0.50-0.93)                   | 0.59(0.32-1.04)         |
| <b>Number of cups/day</b>              |                   |                 |                         |                                   |                         |
| 0 per day                              | 1                 | 1               | 1                       | 1                                 | 1                       |
| 1-2 cups/day                           | 1                 | 0.97(0.71-1.33) | 1.06(0.61-1.84)         | 0.80(0.55-1.17)                   | 0.71(0.36-1.41)         |
| 3-5 cups/day                           | 1                 | 0.66(0.44-0.98) | 0.57(0.25-1.31)         | 0.49(0.31-0.79)                   | 0.39(0.15-1.00)         |
| ≥ 6 cups/day                           | 1                 | 0.80(0.43-1.50) | 0.71(0.21-2.45)         | 0.75(0.37-1.53)                   | 0.77(0.21-2.86)         |
| <b>Number of years of tea drinking</b> |                   |                 |                         |                                   |                         |
| < 1 year                               | 1                 | 1               | 1                       | 1                                 | 1                       |
| 1-5 years                              | 1                 | 0.64(0.36-1.13) | 1.41(0.44-4.50)         | 0.53(0.26-1.07)                   | 2.13(0.40-11.2)         |
| ≥ 6 years                              | 1                 | 0.61(0.33-1.14) | 0.71(0.18-2.73)         | 0.54(0.24-1.25)                   | 1.67(0.25-11.2)         |

<sup>a</sup> model 1 was a crude multinomial logistic regression which was used for each outcome

<sup>b</sup> model 2 was an adjusted multinomial logistic regression model for each outcome, and was adjusted for age, BMI, personal income, ever pregnant, caffeinated beverages drinking, alcohol drinking now and during last one year, second-hand smoke, supplementation of fish oil, consumption of leaf vegetables, moderate- and walk-intensity physical activity.

**Table 5. Odds ratios for dysmenorrhea according to consumption of type of tea beverage/caffeinated beverage**

| Variable                    | Crude model (cOR) |                 |                         | Adjusted model (aOR) |                         |
|-----------------------------|-------------------|-----------------|-------------------------|----------------------|-------------------------|
|                             | No (486)          | mild (574)      | Moderate-to-severe (92) | Mild (574)           | Moderate-to-severe (92) |
| <b><sup>a</sup> Model 1</b> |                   |                 |                         |                      |                         |
| Green tea                   | 1                 | 0.74(0.56-0.97) | 0.61(0.35-1.05)         | 0.63(0.44-0.90)      | 0.42(0.20-0.85)         |
| Black tea                   | 1                 | 1.09(0.78-1.53) | 1.38(0.78-2.44)         | 1.27(0.81-2.00)      | 1.96(0.94-4.10)         |
| Oolong tea                  | 1                 | 0.73(0.48-1.10) | 0.38(0.13-1.08)         | 0.60(0.35-1.03)      | 0.34(0.11-1.09)         |
| <b><sup>b</sup> Model 2</b> |                   |                 |                         |                      |                         |
| Coffee                      | 1                 | 1.06(0.83-1.35) | 2.22(1.40-3.52)         | 1.08(0.80-1.44)      | 2.11(1.22-3.62)         |
| Soda                        | 1                 | 1.12(0.87-1.45) | 1.78(1.13-2.81)         | 1.05(0.76-1.44)      | 1.20(0.69-2.10)         |
| Energy beverages            | 1                 | 1.25(0.73-2.13) | 2.61(1.23-5.54)         | 0.91(0.50-1.69)      | 1.65(0.66-4.15)         |

<sup>a</sup> model 1 was a multinomial logistic regression model which was used for each type of tea beverage separately, and was further adjusted for other types of tea beverages, age, BMI, personal income, ever pregnant, caffeinated beverages drinking, alcohol drinking now and during last one year, second-hand smoke, supplementation of fish oil, consumption of leaf vegetables, moderate- and walk-intensity physical activity

<sup>b</sup> model 2 was a multinomial logistic regression model which was used for each caffeinated beverage separately, and was further adjusted for other caffeinated beverages, age, BMI, personal income, ever pregnant, second-hand smoke, walk-intensity physical activity and tea drinking

1  
2  
3 As for the relationship between each caffeine-contained beverage (coffee, Soda and energy  
4 drink) and severity of dysmenorrhea (Table 5), women with moderate-to-severe dysmenorrhea  
5 were twice more likely to be coffee drinkers than women without dysmenorrhea. However, after  
6 adjusting for potential confounders, consumption of neither soda nor energy beverages was  
7 associated with prevalence of moderate-to-severe dysmenorrhea.  
8  
9  
10  
11  
12

## 13 **DISCUSSION**

14  
15 The present study found that more than half of Chinese reproductive age women (57.8%)  
16 had some degree of dysmenorrhea. Exposure to second-hand smoke or consumption of coffee  
17 were positively associated with moderate-to-severe dysmenorrhea. After adjustment for the  
18 potential confounders, consumptions of green tea and possibly oolong tea were associated with  
19 lower prevalence of dysmenorrhea.  
20  
21  
22  
23  
24  
25

26 The prevalence of dysmenorrhea in our population was consistent with previous studies. It  
27 was reported that at least 50% of women around the world[17] and 56.4% of university students  
28 in China suffered from dysmenorrhea.[5] However, the prevalence of severe dysmenorrhea in  
29 this study was slightly lower than the previous study (3.5% vs 6.5%, respectively),[5] which may  
30 be explained by the age difference between the study populations ( $29.4 \pm 3.2$  years in the current  
31 study versus  $20.3 \pm 1.3$  in Zhou's study[5]). Previous literature indicated that menstrual pain was  
32 alleviated to some degree with advancing age.[12, 18, 19]  
33  
34  
35  
36  
37  
38  
39  
40

41 The relationships between dysmenorrhea and menstrual characteristics (such as onset of  
42 menarche, regular menses, bleeding duration) are still uncertain.[20] Some studies reported that  
43 older age at menarche was associated with a decreased risk of dysmenorrhea,[18, 21] while  
44 others showed no association.[12, 22] Unsal et al. found that menstrual irregularity was one of  
45 risk factors for dysmenorrhea [OR=1.90 (1.22-32.95)].[12] As for blood flow, some studies  
46 showed that reduced menstrual flow may be a sign of uterine constriction and it was associated  
47 with cramp pain[1, 23] while others showed that the severity of dysmenorrhea increased with  
48 increasing volume of blood flow.[5, 24] Our study was consistent with the latter finding, that is,  
49  
50  
51  
52  
53  
54  
55  
56  
57  
58  
59  
60

1  
2  
3 women with heavy blood flow were more likely to have dysmenorrhea. However, we did not find  
4 any other relationship between menstrual health and dysmenorrhea. Interestingly, our result  
5 showed that pregnancy history was inversely associated with dysmenorrhea, in line with previous  
6 studies.[12, 18]  
7  
8  
9

10  
11 Our results showed a tendency towards dysmenorrhea relief when women drank tea in daily  
12 life. Those who consumed 3-5 cups/day of tea were 51% less likely to report having mild  
13 dysmenorrhea than non-drinkers. The observation of no relationship between high tea drinking  
14 ( $\geq 6$  cups/day) and dysmenorrhea may be true or due to chance; only 45 participants stated tea  
15 consumption of  $\geq 6$  cups/day. In contrast, a small cross-sectional study with randomly selected  
16 440 female university students in Ethiopia suggested that people drinking tea for more than 4  
17 glasses/day had 19 times higher prevalence of dysmenorrhea than non-drinkers, the  
18 corresponding aOR was 18.94 (2.19-163.73).[13] However, the very wide confidence interval  
19 indicates that the conclusion is uncertain.  
20  
21  
22  
23  
24  
25  
26  
27  
28  
29

30 Among three types of tea, our study showed that consumption of green tea may be beneficial  
31 for relief of dysmenorrhea while consumption of black tea was not. The latter finding is consistent  
32 with the results from a Turkey study - a cross-sectional study with 729 reproductive-age women,  
33 which found no association between tea consumption and dysmenorrhea,[12] as the traditional  
34 tea in Turkey is black tea. Consumption of oolong tea had a borderline association with a lower  
35 prevalence of dysmenorrhea, which may be ascribed to a small sample size. Our study may be  
36 underpowered to detect the desired difference between oolong tea drinkers and non-drinkers.  
37  
38  
39  
40  
41  
42  
43  
44

45 To explore whether caffeine in tea was responsible to the relief of dysmenorrhea, we  
46 examined the association between consumption of caffeinated beverages, especially coffee, and  
47 dysmenorrhea. Unlike tea, consumption of coffee was positively related to the severity of  
48 dysmenorrhea. Unlike tea, consumption of coffee was positively related to the severity of  
49 dysmenorrhea in this study after adjustment of potential confounders. Previous studies showed  
50 that the risk of dysmenorrhea was twice as high in high caffeine consumers ( $\geq 300$  mg/day)  
51 compared with low/moderate caffeine consumers ( $< 300$  mg/day) [OR=1.97 (1.09-3.59)][25] and  
52  
53  
54  
55  
56  
57  
58  
59  
60

1  
2  
3 in coffee consumers [OR=2.08 (1.34-3.24)].[12] The mechanism through which caffeine could  
4 aggravate cramp-like pain is uncertain and further studies are warranted. One possible  
5 mechanism is the vasoconstricting action of caffeine.[26] A study in pregnant women indicates  
6 that caffeine stimulates uterine muscle and, consequently, causes increased uterine  
7 contraction.[27] Uterine hypercontraction reduces blood flow and results in pain.[1]

8  
9  
10  
11  
12  
13 Instead, catechins in green tea might partly explain the observed relationship with relieved  
14 severity of dysmenorrhea. The extent of the oxidative processing (also called “fermentation”)  
15 differs among three types of tea - green tea is minimally processed, while black tea is completely  
16 fermented. Hence, catechins are rich in green tea followed by oolong tea, while much lower in  
17 black tea, as it is unstable and sensitive to oxidization. A number of animal and *in vitro* studies  
18 suggest that green tea extract (catechins) is an effective inhibitor of COX-2 but not COX-1[10, 11]  
19 thereby preventing overproduction of uterine prostaglandin levels, a major pathogenesis of  
20 primary dysmenorrhea. In addition, catechins inhibit the activity of phospholipase A2, an enzyme  
21 involved in the production of arachidonic acid, and consequently decreases the production of  
22 additional prostaglandin from arachidonic acid.[28] Given the high catechins content in green tea,  
23 it is convincingly expected green tea may be beneficial to relieve menstrual cramp by inhibiting  
24 prostaglandin level.

25  
26  
27  
28  
29  
30  
31  
32  
33  
34  
35  
36  
37  
38  
39  
40  
41  
42  
43  
44  
45  
46  
47  
48  
49  
50  
51  
52  
53  
54  
55  
56  
57  
58  
59  
60  
Further studies are needed to specify the role of catechins in dysmenorrhea. Despite the  
promising effect of tea drinking in dysmenorrhea, tea drinking during menstrual period may also  
have unwanted side effects. Catechins and tannic acid rich in tea can chelate iron, thus tend to  
interfere with iron absorption.[29-31] As menstruating women lose iron through bleeding, caution  
of drinking too much tea during menstruation may be warranted.

Several limitations of our study are worth mentioning. First, as our study collected data from  
the study population at a single point of time, it may be difficult to establish a causal relationship  
between tea drinking and dysmenorrhea. Second, this study did not distinguish secondary  
dysmenorrhea from primary dysmenorrhea. However, secondary dysmenorrhea may share some



1  
2  
3 of the same pathways of pain as the primary dysmenorrhea, with an evidence of an increased  
4 level of prostaglandin in endometriosis and adenomyosis.[32, 33] On the other hand, an animal  
5 study has shown that green tea catechins inhibited the development of endometriosis through  
6 anti-angiogenic effects.[34] Thus, it is possible that green tea may potentially be beneficial to both  
7 primary and secondary dysmenorrhea. Third, we did not include information on oral contraceptive  
8 pills use, which may cause potential bias due to residual confounding. However, this study  
9 recruited women of reproductive age who were planning to become pregnant. Therefore, the  
10 number of participants using oral contraceptive pills was negligible. Fourth, the size of a tea  
11 serving and the biochemical quantity in a tea serving vary widely with different methods of  
12 preparing tea between individuals in China. We were unable to standardize the size of tea cups.  
13 Finally, the information on dysmenorrhea was based on participants' self-report and, as such, it  
14 was subject to information bias. However, it is difficult to explain why such a bias only occurred in  
15 certain types of tea but not all types.

16  
17  
18  
19  
20  
21  
22  
23  
24  
25  
26  
27  
28  
29  
30  
31  
32  
33  
34  
35  
36  
37  
38  
39  
40  
41  
42  
43  
44  
45  
46  
47  
48  
49  
50  
51  
52  
53  
54  
55  
56  
57  
58  
59  
60  
The strengths of this study are also worth noting. The large sample size made the results  
more precise. In addition, this study was based on a large cohort, which enables us to involve  
more potential confounders in the analyses. The study population was women who were planning  
to be pregnant, so they were more likely to remember their health-related behaviors and  
characteristics, especially those related to reproduction, such as menstrual characteristics.

In conclusion, our study suggests that drinking green tea was associated with a lower  
prevalence of dysmenorrhea among reproductive-age women in China. On the other hand,  
excessive tea drinking may not be advisable, either, as tea may inhibit iron absorption. Given the  
scarcity of epidemiological evidence of tea drinking and dysmenorrhea, this study gives new  
insights in the possible role of green tea on the relief of dysmenorrhea. Cohort studies and  
subsequent randomized controlled trials are needed to confirm this finding, which may have  
important clinical and public health significance.

## **AUTHOR STATEMENT**



1  
2  
3 J.Z, P.Z and Y.T contributed to study conception and design, and contributed to acquisition  
4 of data. X.Z, D.C and R.H contributed to analysis and interpretation of data. X.Z and R.Z  
5 contributed to drafting article. J.Z, and P.Z contributed to revising the article critically. All authors  
6 reviewed the final version of the manuscript and gave final approval of the version to be  
7 published.  
8  
9  
10  
11  
12

### 13 **FUNDING**

14  
15 This work was supported by the National Basic Science Research Program Ministry of  
16 Science and Technology of China (2014CB943300; 2014DFG31460); the Shanghai Municipal  
17 Commission of Health and Family Planning (GWIII-26; 2017ZZ02026); Shanghai Jiao Tong  
18 University 985 Fund and the National Human Genetic Resources Sharing Service Platform  
19 (2005DKA21300).  
20  
21  
22  
23  
24  
25

### 26 **DECLARATION OF INTEREST**

27  
28 There is no conflict of interest that could be perceived.  
29

### 30 **DATA SHARING**

31  
32 Currently, the Shanghai Birth Cohort data are not yet open to public due to the confidentiality  
33 agreement. Data used in this analysis and computing programs are available from the  
34 corresponding author upon request.  
35  
36  
37  
38

### 39 **ETHICAL APPROVAL**

40  
41 This study is based on the Shanghai Birth Cohort which was approved by the Institutional  
42 Review Board of Xinhua Hospital affiliated to the Shanghai Jiao Tong University School of  
43 Medicine, and no additional review was needed for this analysis. All participants signed an  
44 informed consent.  
45  
46  
47  
48

### 49 **ACKNOWLEDGEMENTS**

50  
51 This study was partly funded by the Shanghai Municipal Commission of Health and Family  
52 Planning (GWIII-26) and Shanghai Jiao Tong University 985 Fund and supported by the National  
53 Human Genetic Resources Sharing Service Platform (2005DKA21300).  
54  
55  
56

## REFERENCES

1. Dawood MY. Primary dysmenorrhea - Advances in pathogenesis and management. *Obstet Gynecol* 2006;108(2):428-41.
2. Proctor M, Farquhar C. Diagnosis and management of dysmenorrhoea. *BMJ* 2006;332(7550):1134-8B.
3. Latthe P, Latthe M, Say L, et al. WHO systematic review of prevalence of chronic pelvic pain: a neglected reproductive health morbidity. *Bmc Public Health* 2006;6.
4. Wong, CL. Health-related quality of life among Chinese adolescent girls with Dysmenorrhoea. *Reprod Health* 2018;15(1):80.
5. Zhou HG, Yang ZW. Prevalence of dysmenorrhea in female students in a Chinese university: A prospective study. *Health* 2010;2(4):311-4.
6. Vincenzo De Sanctis MD, Soliman A, Bernasconi S, et al. Primary dysmenorrhea in adolescents: prevalence, impact and recent knowledge. *Pediatr Endocrinol Rev* 2015;13(2).
7. Akiyama S, Tanaka E, Cristeau O, et al. Evaluation of the treatment patterns and economic burden of dysmenorrhea in Japanese women, using a claims database. *Clinicoecon Outcomes Res* 2017;9:295.
8. Iacovides S, Avidon I, Baker FC. What we know about primary dysmenorrhea today: a critical review. *Hum Reprod Update* 2015;21(6):762-78.
9. Zahradnik HP, Hanjalic-Beck A, Groth K. Nonsteroidal anti-inflammatory drugs and hormonal contraceptives for pain relief from dysmenorrhea: a review. *Contraception* 2010;81(3):185-96.
10. Hussain T, Gupta S, Adhami VM, et al. Green tea constituent epigallocatechin-3-gallate selectively inhibits COX-2 without affecting COX-1 expression in human prostate carcinoma cells. *Int J Cancer* 2005;113(4):660-9.
11. Chung MY, Mah E, Masterjohn C, et al. Green Tea Lowers Hepatic COX-2 and Prostaglandin E2 in Rats with Dietary Fat-Induced Nonalcoholic Steatohepatitis. *J med Food* 2015;18(6):648-55.

12. Unsal A, Tozun M, Aslan G, et al. Evaluation of dysmenorrhea among women and its impact on quality of life in a region of western Turkey. *Pak J Med Sci* 2010;26(1):142-7.
13. Hailemeskel S DA, Assefa N. Primary dysmenorrhea magnitude, associated risk factors, and its effect on academic performance: evidence from female university students in Ethiopia. *Int J Womens Health* 2016;8:489.
14. IPAQ. self-admin International Physical Activity Questionnaire  
<https://sites.google.com/site/theipaq/> assessed March 4, 20172010.
15. Bourdel N, Alves J, Pickering G, et al. Systematic review of endometriosis pain assessment: how to choose a scale? *Hum Reprod Update* 2014;21(1):136-52.
16. Berkley K. Primary dysmenorrhea: an urgent mandata. *Pain*. 2013;1(1).
17. Patel V, Tanksale V, Sahasrabhojane M, et al. The burden and determinants of dysmenorrhoea: a population-based survey of 2262 women in Goa, India. *BJOG* 2006;113(4):453-63.
18. Tavallae M, Joffres MR, Corber SJ, et al. The prevalence of menstrual pain and associated risk factors among Iranian women. *J Obstet Gynaecol Res* 2011;37(5):442-51.
19. Ju H, Jones M, Mishra G. The Prevalence and Risk Factors of Dysmenorrhea. *Epidemiol Rev* 2014;36(1):104-13.
20. Latthe P, Mignini L, Gray R, et al. Factors predisposing women to chronic pelvic pain: systematic review. *BMJ* 2006;332(7544):749-51.
21. Burnett MA, Antao V, Black A, et al. Prevalence of primary dysmenorrhea in Canada. Journal of obstetrics and gynaecology Canada. *J Obstet Gynaecol Can* 2005;27(8):765-70.
22. Altunyurt S, Gol M, Sezer O, et al. Primary dysmenorrhea and uterine blood flow. *J Reprod Med* 2005;50(4):251-5.
23. Osayande, AS., Mehulic, S. Diagnosis and initial management of dysmenorrhea. *Am Fam Physician* 2014;89(5):341-6.
24. Faramarzi M, Salmalian H. Association of psychologic and nonpsychologic factors with

- 1  
2  
3 primary dysmenorrhea. *Iran Red Crescent Med J* 2014;16(8).  
4  
5 25. Echeverri D, Montes FR, Cabrera M, et al. Caffeine's Vascular Mechanisms of Action. *Int J*  
6  
7 *Vasc Med* 2010;2010.  
8  
9 26. Buscicchio G, Piemontese M, Gentilucci L, et al. The effects of maternal caffeine and  
10  
11 chocolate intake on fetal heart rate. *J Matern Fetal Neonatal Med* 2012;25(5):528-30.  
12  
13 27. Choi JH, Chang HW, Rhee SJ. Effect of green tea catechin on arachidonic acid cascade in  
14  
15 chronic cadmium-poisoned rats. *Asia Pac J Clin Nutr* 2002;11(4):292-7.  
16  
17 28. Zijp IM, Korver O, Tijburg LBM. Effect of tea and other dietary factors on iron absorption.  
18  
19 Critical Reviews in Food Science and Nutrition. *Crit Rev Food Sci Nutr* 2000;40(5):371-98.  
20  
21 29. Delimont NM, Haub MD, & Lindshield BL. The Impact of Tannin Consumption on Iron  
22  
23 Bioavailability and Status: A Narrative Review1. *CDN* 2017;1(2):1-12.  
24  
25 30. Fan FS. Iron deficiency anemia due to excessive green tea drinking. *Clin Case Rep*  
26  
27 2016;4(11):1053-6.  
28  
29 31. Wu MH, Lu CW, Chuang PC, et al. Prostaglandin E-2: the master of endometriosis? *Exp Biol*  
30  
31 *Med* 2010;235(6):668-77.  
32  
33 32. Rakhila H, Bourcier N, Akoum A, et al. Abnormal Expression of Prostaglandins E2 and F2  
34  
35 alpha Receptors and Transporters in Patients with Endometriosis. *Biomed Res Int* 2015.  
36  
37 33. Xu H, Lui WT, Chu CY, et al. Anti-angiogenic effects of green tea catechin on an  
38  
39 experimental endometriosis mouse model. *Hum reprod* 2009;24(3):608-18.  
40  
41 34. Nunnink S, Meana M, Gynecology. Remembering the pain: accuracy of pain recall in  
42  
43 endometriosis. *J Psychosom Obstet Gynaecol* 2007;28(4):201-8.  
44  
45  
46  
47  
48  
49  
50  
51  
52  
53  
54  
55  
56  
57  
58  
59  
60

**STROBE 2007 (v4) checklist of items to be included in reports of observational studies in epidemiology\***  
**Checklist for cohort, case-control, and cross-sectional studies (combined)**

| Section/Topic             | Item # | Recommendation                                                                                                                                                                                                                                                                                                                                                                                                                                                         | Reported on page # |
|---------------------------|--------|------------------------------------------------------------------------------------------------------------------------------------------------------------------------------------------------------------------------------------------------------------------------------------------------------------------------------------------------------------------------------------------------------------------------------------------------------------------------|--------------------|
| Title and abstract        | 1      | (a) Indicate the study’s design with a commonly used term in the title or the abstract                                                                                                                                                                                                                                                                                                                                                                                 | 2                  |
|                           |        | (b) Provide in the abstract an informative and balanced summary of what was done and what was found                                                                                                                                                                                                                                                                                                                                                                    | 2                  |
| <b>Introduction</b>       |        |                                                                                                                                                                                                                                                                                                                                                                                                                                                                        |                    |
| Background/rationale      | 2      | Explain the scientific background and rationale for the investigation being reported                                                                                                                                                                                                                                                                                                                                                                                   | 4                  |
| Objectives                | 3      | State specific objectives, including any pre-specified hypotheses                                                                                                                                                                                                                                                                                                                                                                                                      | 5                  |
| <b>Methods</b>            |        |                                                                                                                                                                                                                                                                                                                                                                                                                                                                        |                    |
| Study design              | 4      | Present key elements of study design early in the paper                                                                                                                                                                                                                                                                                                                                                                                                                | 5                  |
| Setting                   | 5      | Describe the setting, locations, and relevant dates, including periods of recruitment, exposure, follow-up, and data collection                                                                                                                                                                                                                                                                                                                                        | 5                  |
| Participants              | 6      | (a) <i>Cohort study</i> —Give the eligibility criteria, and the sources and methods of selection of participants. Describe methods of follow-up<br><i>Case-control study</i> —Give the eligibility criteria, and the sources and methods of case ascertainment and control selection. Give the rationale for the choice of cases and controls<br><i>Cross-sectional study</i> —Give the eligibility criteria, and the sources and methods of selection of participants | 5                  |
|                           |        | (b) <i>Cohort study</i> —For matched studies, give matching criteria and number of exposed and unexposed<br><i>Case-control study</i> —For matched studies, give matching criteria and the number of controls per case                                                                                                                                                                                                                                                 |                    |
| Variables                 | 7      | Clearly define all outcomes, exposures, predictors, potential confounders, and effect modifiers. Give diagnostic criteria, if applicable                                                                                                                                                                                                                                                                                                                               | 6-7                |
| Data sources/ measurement | 8*     | For each variable of interest, give sources of data and details of methods of assessment (measurement). Describe comparability of assessment methods if there is more than one group                                                                                                                                                                                                                                                                                   | 6                  |
| Bias                      | 9      | Describe any efforts to address potential sources of bias                                                                                                                                                                                                                                                                                                                                                                                                              | 7                  |
| Study size                | 10     | Explain how the study size was arrived at                                                                                                                                                                                                                                                                                                                                                                                                                              | 7                  |
| Quantitative variables    | 11     | Explain how quantitative variables were handled in the analyses. If applicable, describe which groupings were chosen and why                                                                                                                                                                                                                                                                                                                                           | 6                  |
| Statistical methods       | 12     | (a) Describe all statistical methods, including those used to control for confounding                                                                                                                                                                                                                                                                                                                                                                                  | 7                  |
|                           |        | (b) Describe any methods used to examine subgroups and interactions                                                                                                                                                                                                                                                                                                                                                                                                    | 6                  |
|                           |        | (c) Explain how missing data were addressed                                                                                                                                                                                                                                                                                                                                                                                                                            |                    |
|                           |        | (d) <i>Cohort study</i> —If applicable, explain how loss to follow-up was addressed<br><i>Case-control study</i> —If applicable, explain how matching of cases and controls was addressed                                                                                                                                                                                                                                                                              |                    |

|                          |     |                                                                                                                                                                                                                                                                                                                                                                                                               |              |
|--------------------------|-----|---------------------------------------------------------------------------------------------------------------------------------------------------------------------------------------------------------------------------------------------------------------------------------------------------------------------------------------------------------------------------------------------------------------|--------------|
|                          |     | <i>Cross-sectional study</i> —If applicable, describe analytical methods taking account of sampling strategy                                                                                                                                                                                                                                                                                                  |              |
|                          |     | (e) Describe any sensitivity analyses                                                                                                                                                                                                                                                                                                                                                                         |              |
| <b>Results</b>           |     |                                                                                                                                                                                                                                                                                                                                                                                                               |              |
| Participants             | 13* | (a) Report numbers of individuals at each stage of study—eg numbers potentially eligible, examined for eligibility, confirmed eligible, included in the study, completing follow-up, and analysed<br>(b) Give reasons for non-participation at each stage<br>(c) Consider use of a flow diagram                                                                                                               | 7            |
| Descriptive data         | 14* | (a) Give characteristics of study participants (eg demographic, clinical, social) and information on exposures and potential confounders<br>(b) Indicate number of participants with missing data for each variable of interest<br>(c) <i>Cohort study</i> —Summarise follow-up time (eg, average and total amount)                                                                                           | 7-10<br>7-10 |
| Outcome data             | 15* | <i>Cohort study</i> —Report numbers of outcome events or summary measures over time<br><i>Case-control study</i> —Report numbers in each exposure category, or summary measures of exposure<br><i>Cross-sectional study</i> —Report numbers of outcome events or summary measures                                                                                                                             | 7            |
| Main results             | 16  | (a) Give unadjusted estimates and, if applicable, confounder-adjusted estimates and their precision (eg, 95% confidence interval). Make clear which confounders were adjusted for and why they were included<br>(b) Report category boundaries when continuous variables were categorized<br>(c) If relevant, consider translating estimates of relative risk into absolute risk for a meaningful time period | 11-12        |
| Other analyses           | 17  | Report other analyses done—eg analyses of subgroups and interactions, and sensitivity analyses                                                                                                                                                                                                                                                                                                                |              |
| <b>Discussion</b>        |     |                                                                                                                                                                                                                                                                                                                                                                                                               |              |
| Key results              | 18  | Summarise key results with reference to study objectives                                                                                                                                                                                                                                                                                                                                                      | 12-13        |
| Limitations              | 19  | Discuss limitations of the study, taking into account sources of potential bias or imprecision. Discuss both direction and magnitude of any potential bias                                                                                                                                                                                                                                                    | 15-16        |
| Interpretation           | 20  | Give a cautious overall interpretation of results considering objectives, limitations, multiplicity of analyses, results from similar studies, and other relevant evidence                                                                                                                                                                                                                                    | 13-15        |
| Generalisability         | 21  | Discuss the generalisability (external validity) of the study results                                                                                                                                                                                                                                                                                                                                         |              |
| <b>Other information</b> |     |                                                                                                                                                                                                                                                                                                                                                                                                               |              |
| Funding                  | 22  | Give the source of funding and the role of the funders for the present study and, if applicable, for the original study on which the present article is based                                                                                                                                                                                                                                                 | 16           |

\*Give information separately for cases and controls in case-control studies and, if applicable, for exposed and unexposed groups in cohort and cross-sectional studies.

**Note:** An Explanation and Elaboration article discusses each checklist item and gives methodological background and published examples of transparent reporting. The STROBE checklist is best used in conjunction with this article (freely available on the Web sites of PLoS Medicine at <http://www.plosmedicine.org/>, Annals of Internal Medicine at <http://www.annals.org/>, and Epidemiology at <http://www.epidem.com/>). Information on the STROBE Initiative is available at [www.strobe-statement.org](http://www.strobe-statement.org).
